# Supplementary material for: The 1-way on-line coupled model system MECO(n) – Part 4: Chemical evaluation (based on MESSy v2.52)
Source: Copernicus journal article supplement (doi:10.5194/gmd-9-3545-2016), 2016-10-04
Supplement: Supplementary file 2 [file supplement.pdf › zip/supplement.pdf]

**Supplement to The 1-way on-line coupled model system  
MECO(n) – Part 4: Chemical evaluation (based on MESSy  
v2.52)**

Mariano Mertens  
Institut für Physik der Atmosphäre  
DLR-Oberpfaffenhofen

`mariano.mertens@dlr.de`

August 2016

## Contents

|                                                                                  |           |
|----------------------------------------------------------------------------------|-----------|
| <b>S1 Supplementary figures</b>                                                  | <b>3</b>  |
| S1.1 Dry deposition rates . . . . .                                              | 3         |
| S1.2 On-line calculated emissions of soil-NO <sub>x</sub> and isoprene . . . . . | 5         |
| S1.3 Annual cycle of ozone at different stations . . . . .                       | 6         |
| S1.4 Taylor diagrams with non 'height corrected' results . . . . .               | 8         |
| S1.5 Nitrogen dioxide concentrations for June 2008 . . . . .                     | 9         |
| S1.6 Nitric acid concentrations . . . . .                                        | 10        |
| S1.7 Isoprene mixing ratios . . . . .                                            | 12        |
| S1.8 Vertical ozone profiles . . . . .                                           | 14        |
| <b>S2 Comparison with ERA-Interim</b>                                            | <b>19</b> |
| S2.1 CM50 . . . . .                                                              | 19        |
| S2.2 CM12 . . . . .                                                              | 27        |
| <b>S3 Comparison with temperature profiles from ozone sondes</b>                 | <b>30</b> |
| S3.1 CM50 . . . . .                                                              | 30        |
| <b>S4 COSMO-Namelist</b>                                                         | <b>33</b> |
| S4.1 'lmgrid'-namelist . . . . .                                                 | 33        |
| S4.2 'runctl'-namelist . . . . .                                                 | 34        |
| S4.3 'tuning'-namelist . . . . .                                                 | 36        |
| S4.4 'dyncontrol'-namelist . . . . .                                             | 37        |
| S4.5 'phycontrol'-namelist . . . . .                                             | 39        |
| <b>S5 List of used stations</b>                                                  | <b>41</b> |
| <b>S6 Detailed list of used submodels</b>                                        | <b>44</b> |
| <b>S7 References</b>                                                             | <b>46</b> |

## S1 Supplementary figures

### S1.1 Dry deposition rates

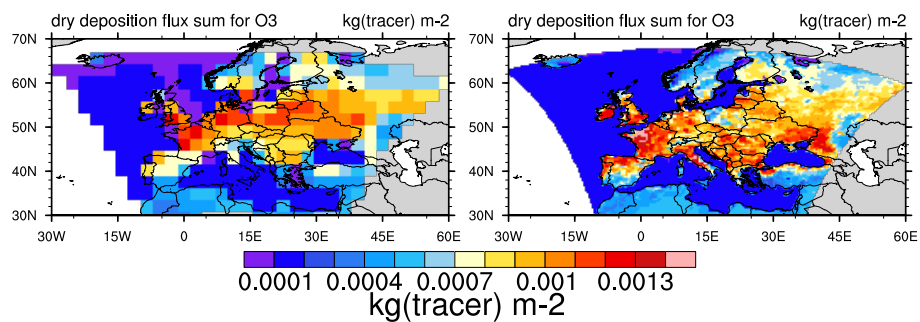

Figure S1: Dry deposition sum for June 2008 of ozone (in  $\text{kg m}^{-2}$ ) from EMAC (left) and COSMO (right). Over Poland less ozone is deposited in COSMO compared to EMAC. This is due to different soil types in both models.

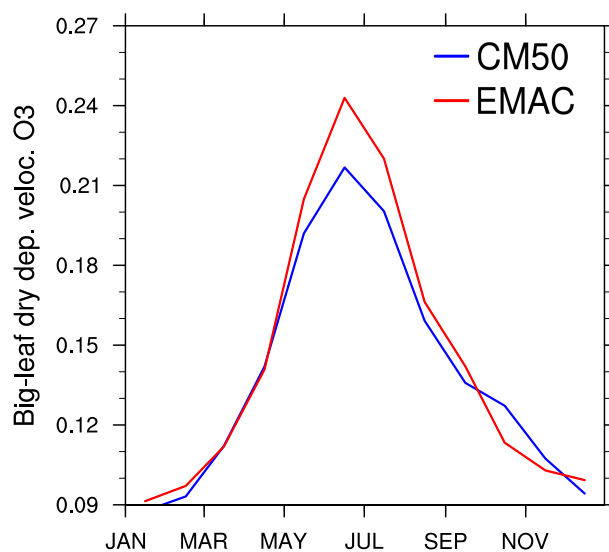

Figure S2: Monthly area weighted average dry deposition flux velocity (in  $\text{cm s}^{-1}$ ) for EMAC and COSMO.

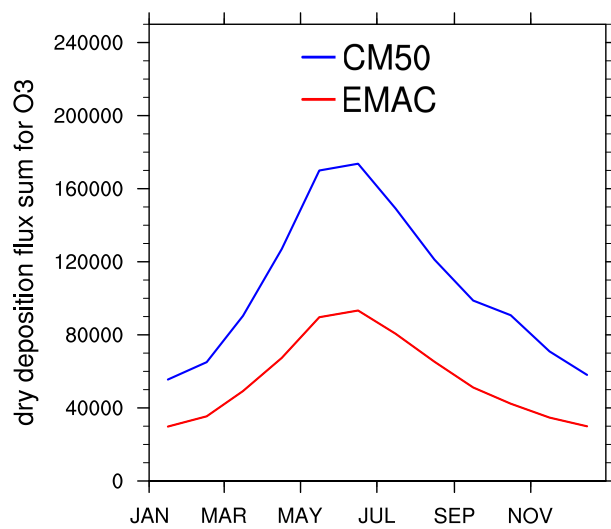

Figure S3: Monthly averaged dry deposition flux (in kg O<sub>3</sub>) from EMAC and COSMO.



## S1.2 On-line calculated emissions of soil-NO<sub>x</sub> and isoprene

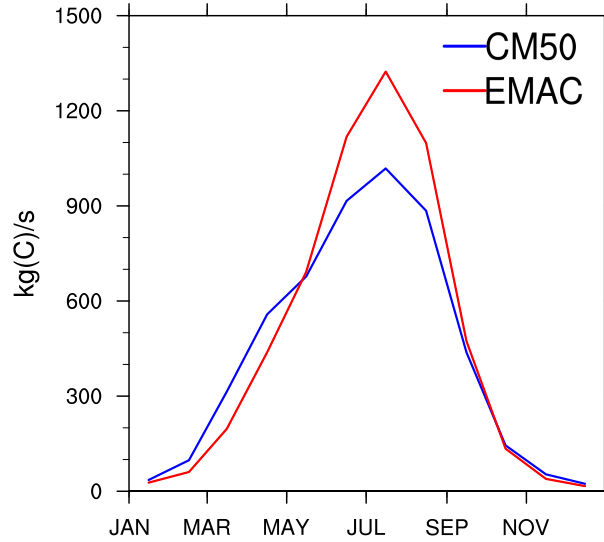

Figure S4: Monthly averaged on-line emissions of isoprene (in kg(C) s<sup>-1</sup>). The emissions are summed over all gridboxes within the domain of the CM50 instance (neglecting the relaxation area). Please note, that the unscaled emissions are plotted.

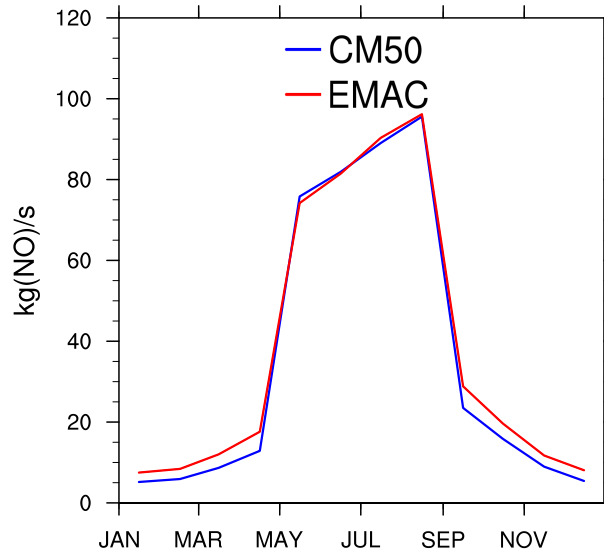

Figure S5: Monthly averaged on-line emissions of soil-NO<sub>x</sub> (in kg(NO) s<sup>-1</sup>). The emissions are summed over all gridboxes within the domain of the CM50 instance (neglecting the relaxation area). The increase of the emissions in the period from May - August are mainly due to the fact, that the algorithm assumes increased fertilization of agricultural areas in this period.

### S1.3 Annual cycle of ozone at different stations

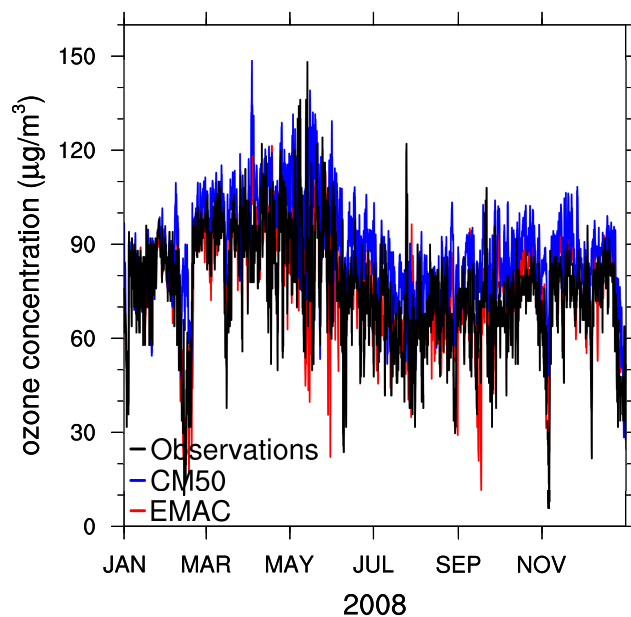

Figure S6: Box-smoothed (7 days) average of ozone concentration (observed and simulated) at the Mace Head station in Ireland.

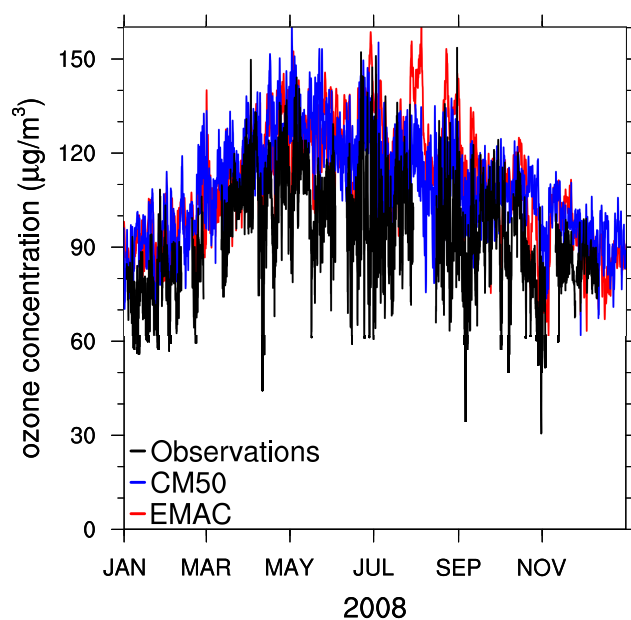

Figure S7: As Fig. S6 but for Giordan Lighthouse, Malta.

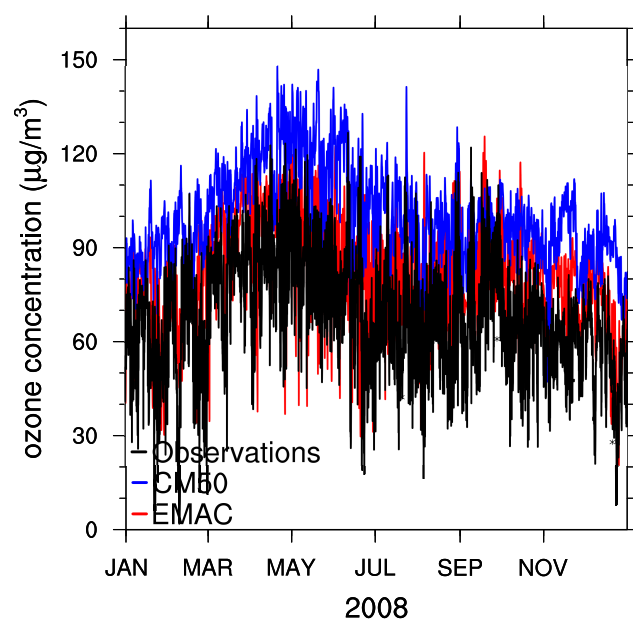

Figure S8: As Fig. S6 but for Niembro, Spain.

### S1.4 Taylor diagrams with non 'height corrected' results

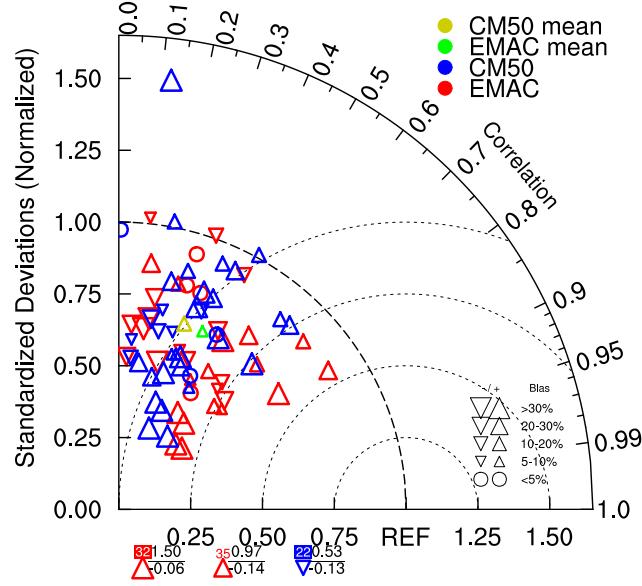

Figure S9: Taylor diagram for ground level ozone concentrations in June 2008. The results for EMAC are indicated in red, for COSMO/MESSy in blue. The mean over all stations is coloured in green for EMAC and in golden colour for COSMO/MESSy. The size of the symbols indicate the bias in percent; upward symbols show a positive bias, downward symbols a negative bias. In difference to the Taylor diagram in the main manuscript the non height corrected values are used here.

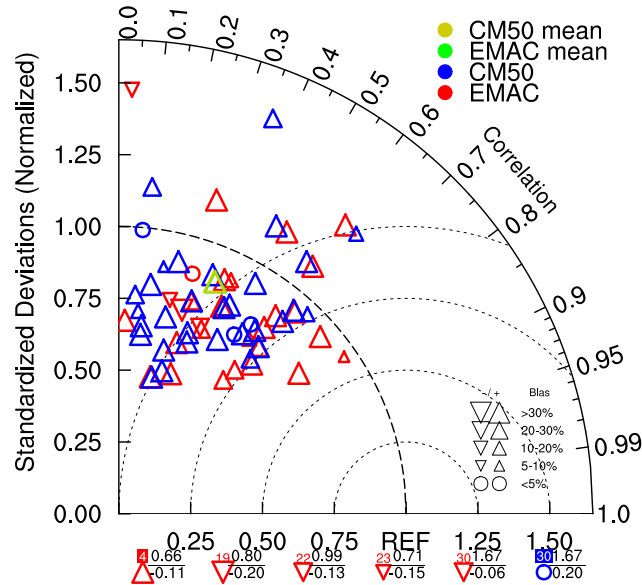

Figure S10: As Fig. S9 but for December 2008.

### S1.5 Nitrogen dioxide concentrations for June 2008

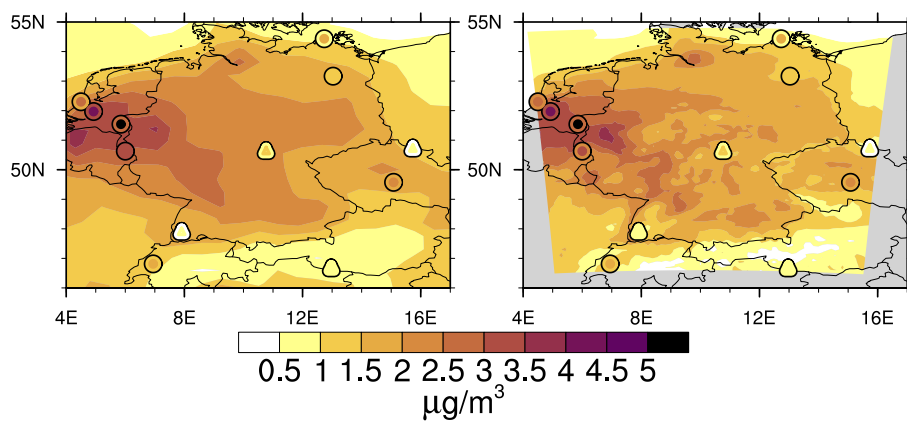

Figure S11: Monthly averaged nitrogen dioxide concentrations in  $\mu\text{g (N) m}^{-3}$  from CM50 (left) and CM12 (right) at the lowest model layer for June 2008. The inner part of the coloured dots depicts the monthly mean values measured at the corresponding stations, while the outer part shows the simulated value corrected for the station height.

## S1.6 Nitric acid concentrations

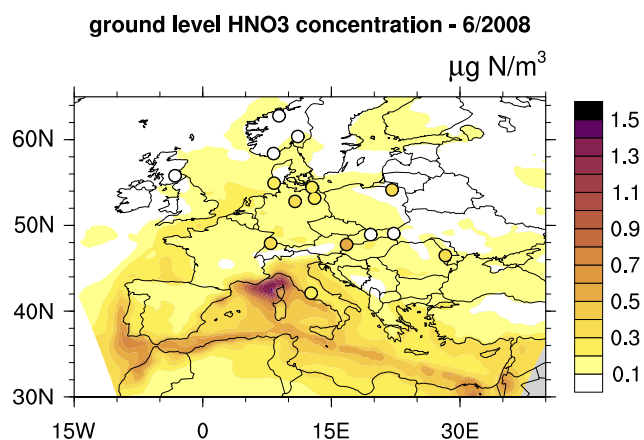

Figure S12: Monthly averaged nitric acid concentrations in  $\mu\text{g (N) m}^{-3}$  from CM50 at the lowest model layer for June 2008. The coloured dots depicts the monthly mean values measured at the corresponding stations.

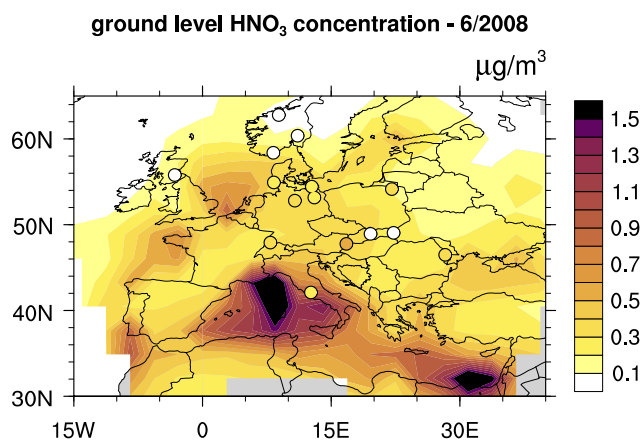

Figure S13: As figure S12 but for EMAC.

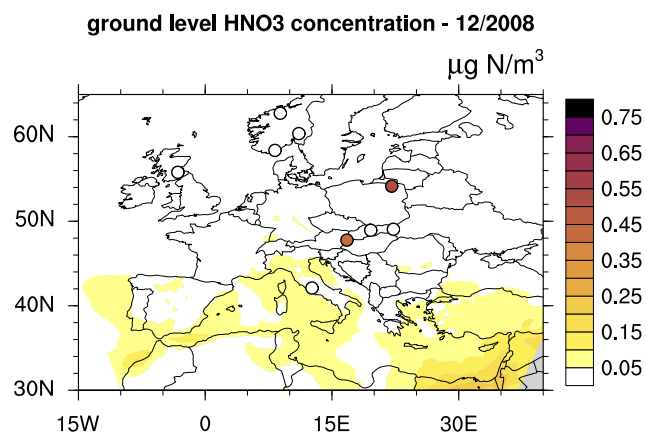

Figure S14: Monthly averaged nitric acid concentrations in  $\mu\text{g (N) m}^{-3}$  from CM50 at the lowest model layer for December 2008. The coloured dots show the monthly mean values measured at the corresponding stations.

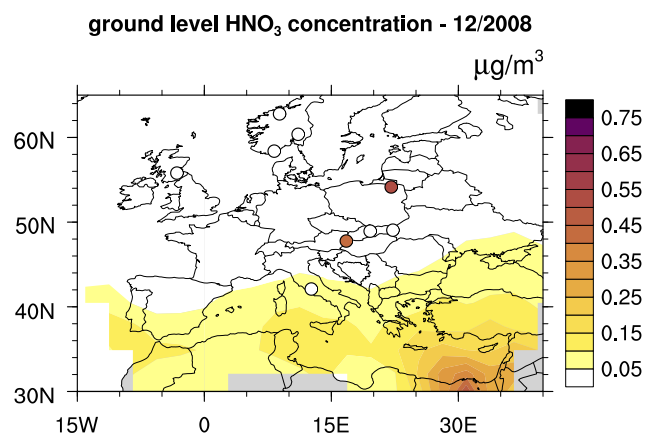

Figure S15: As Fig. S14 but for EMAC.

### S1.7 Isoprene mixing ratios

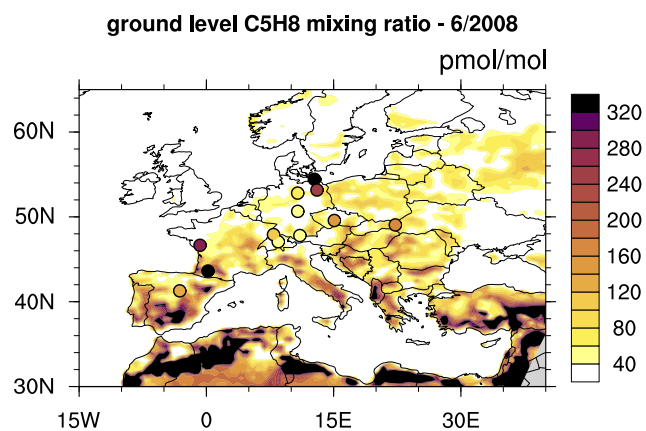

Figure S16: Monthly averaged isoprene mixing ratios in  $\text{pmol mol}^{-1}$  from CM50 at the lowest model layer for June 2008. The coloured dots show the monthly mean values measured at the corresponding stations.

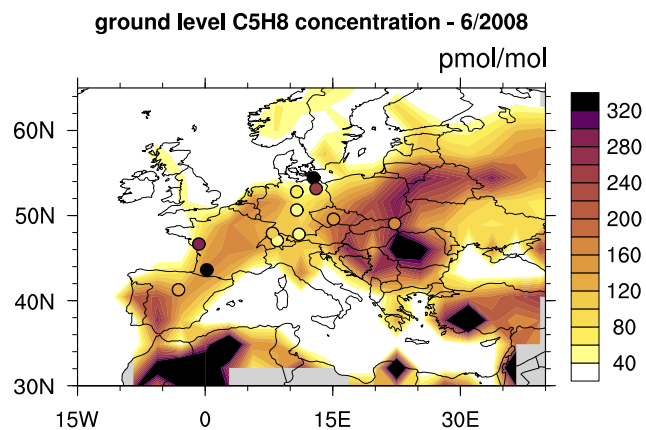

Figure S17: As Fig. S16 but for EMAC.



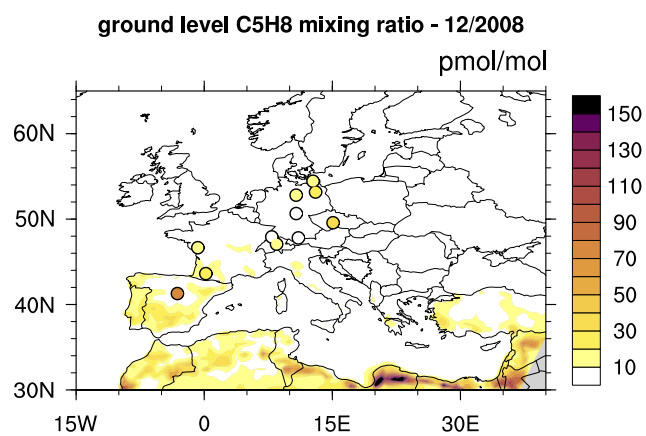

Figure S18: Monthly averaged isoprene mixing ratios in  $\text{pmol mol}^{-1}$  from CM50 at the lowest model layer for June 2008. The coloured dots show the monthly mean values measured at the corresponding stations.

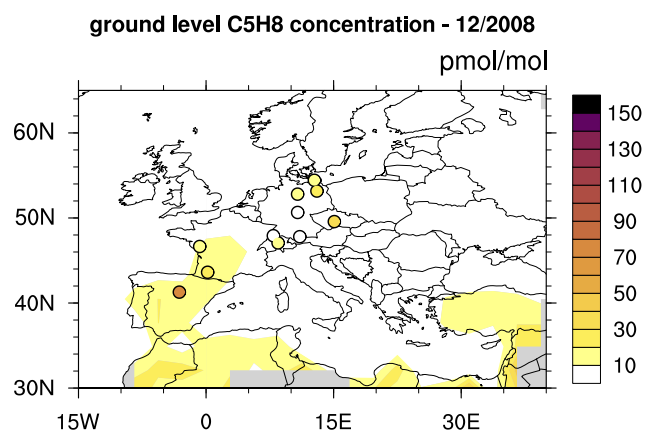

Figure S19: As Fig. S18 but from EMAC.

## S1.8 Vertical ozone profiles

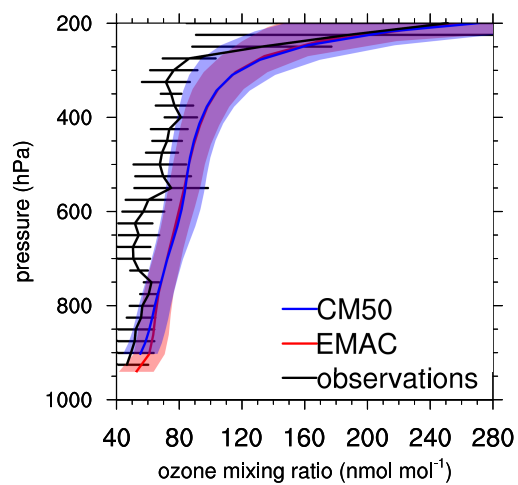

Figure S20: Vertical ozone profile at Madrid for June 2008. The standard deviation of the temporal mean is indicated by the error bars for the observations and by the shaded area for the model data.

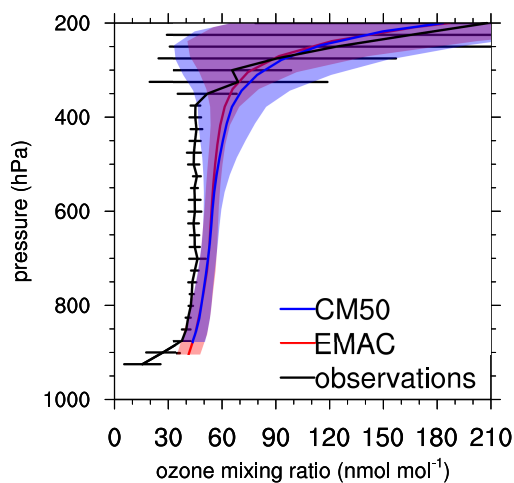

Figure S21: As Fig. S20 but for December 2008.

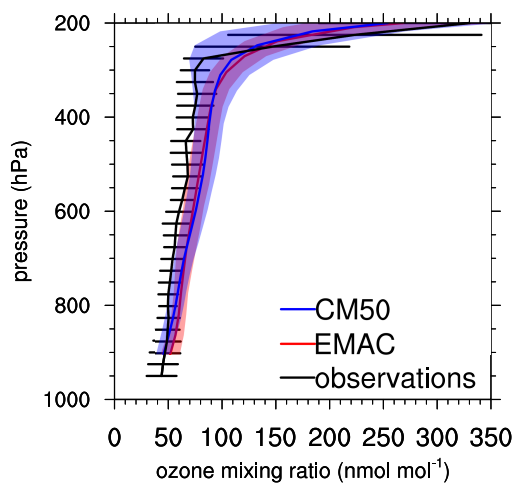

Figure S22: Vertical ozone profile at Payerne for June 2008. The standard deviation of the temporal mean is indicated by the error bars for the observations and by the shaded area for the model data.

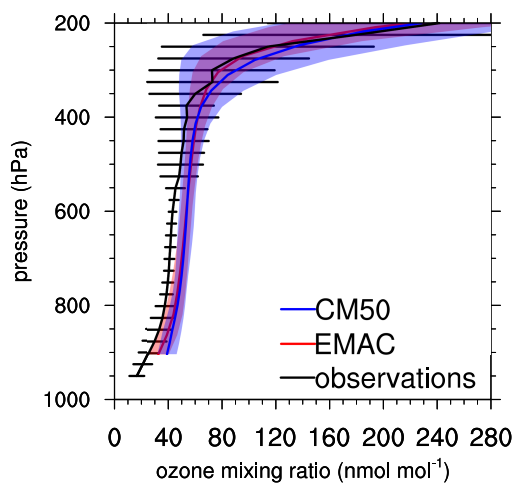

Figure S23: As Fig. S23 but for December 2008.

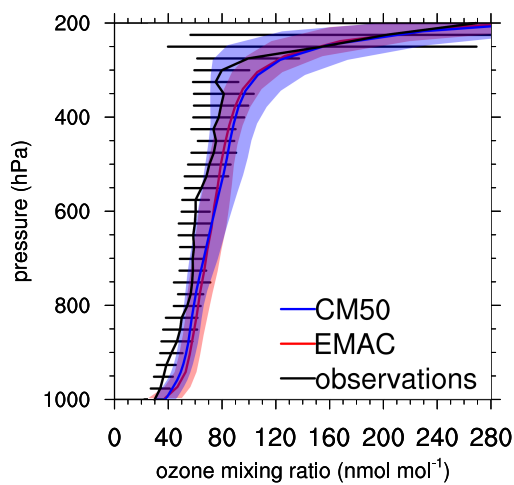

Figure S24: Vertical ozone profile at Uccle for June 2008. The standard deviation of the temporal mean is indicated by the error bars for the observations and by the shaded area for the model data.

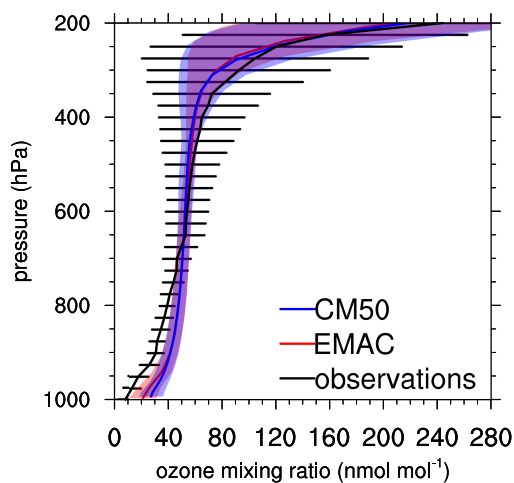

Figure S25: As Fig. S25 but for December 2008.

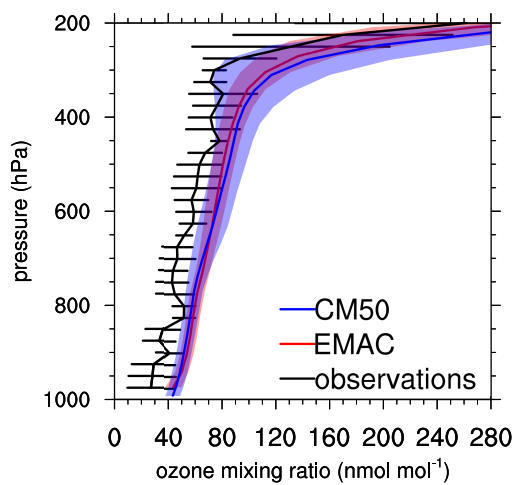

Figure S26: Vertical ozone profile at Legionowo for June 2008. The standard deviation of the temporal mean is indicated by the error bars for the observations and by the shaded area for the model data.

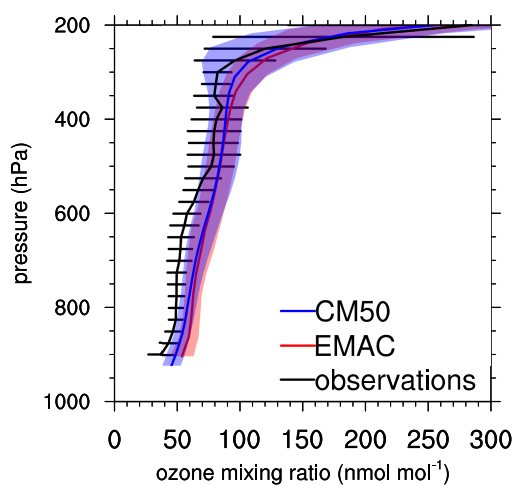

Figure S27: Vertical ozone profile at Hohenpeissenberg for June 2008. The standard deviation of the temporal mean is indicated by the error bars for the observations and by the shaded area for the model data.

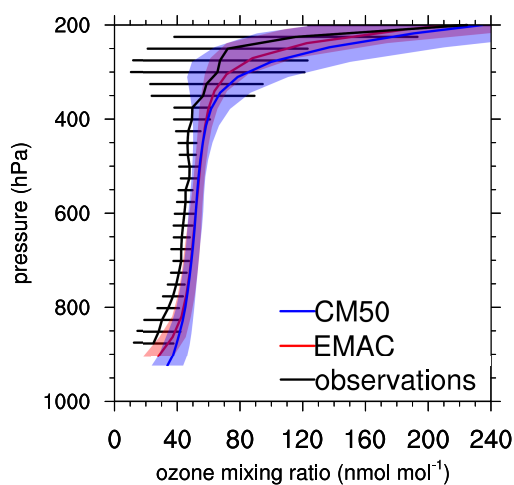

Figure S28: Vertical ozone profile at Hohenpeissenberg for June 2008. The standard deviation of the temporal mean is indicated by the error bars for the observations and by the shaded area for the model data.

## S2 Comparison with ERA-Interim

### S2.1 CM50

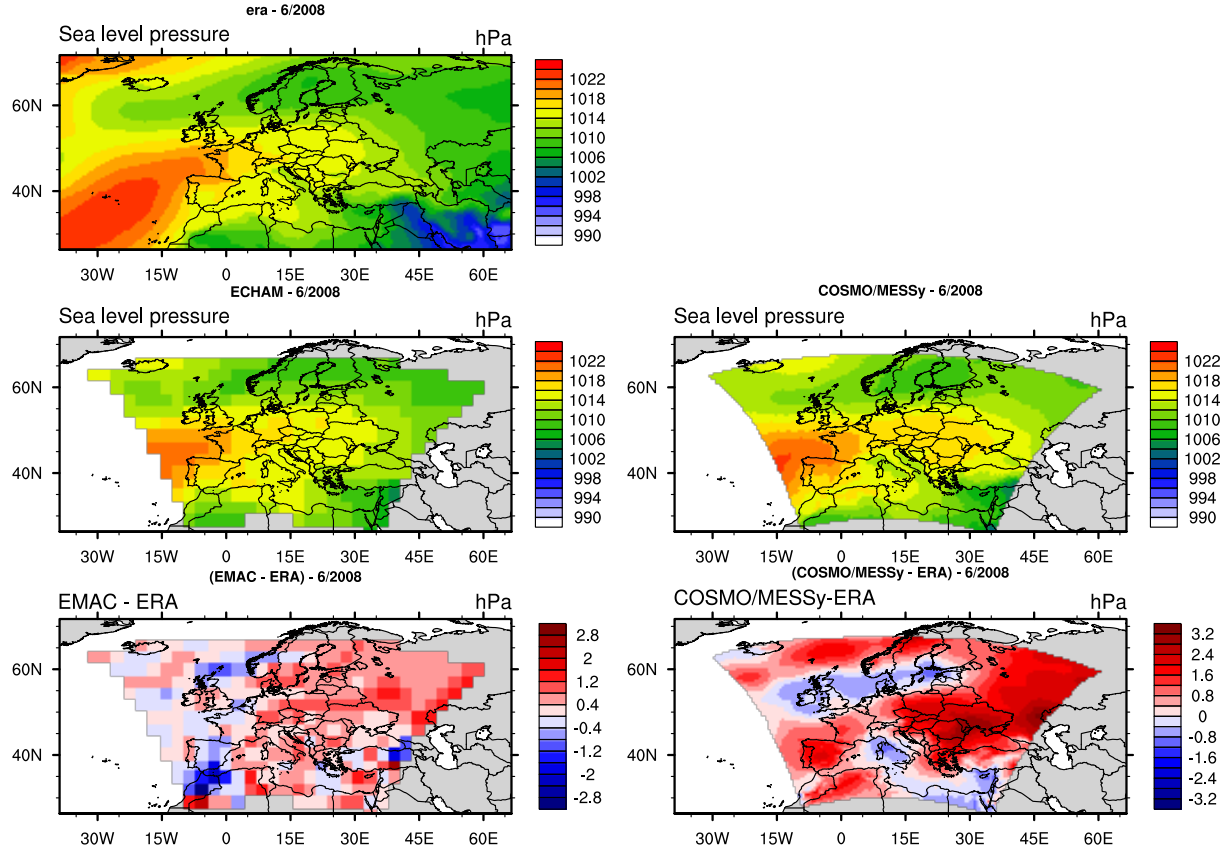

Figure S29: Comparison of the mean sea level pressure (in hPa) between EMAC, CM50 and ERA Interim for June 2008. The upper three plots show the absolute values for ERA-Interim, EMAC and CM50. The lower row depicts the difference to ERA-Interim for EMAC (left) and CM50 (right).

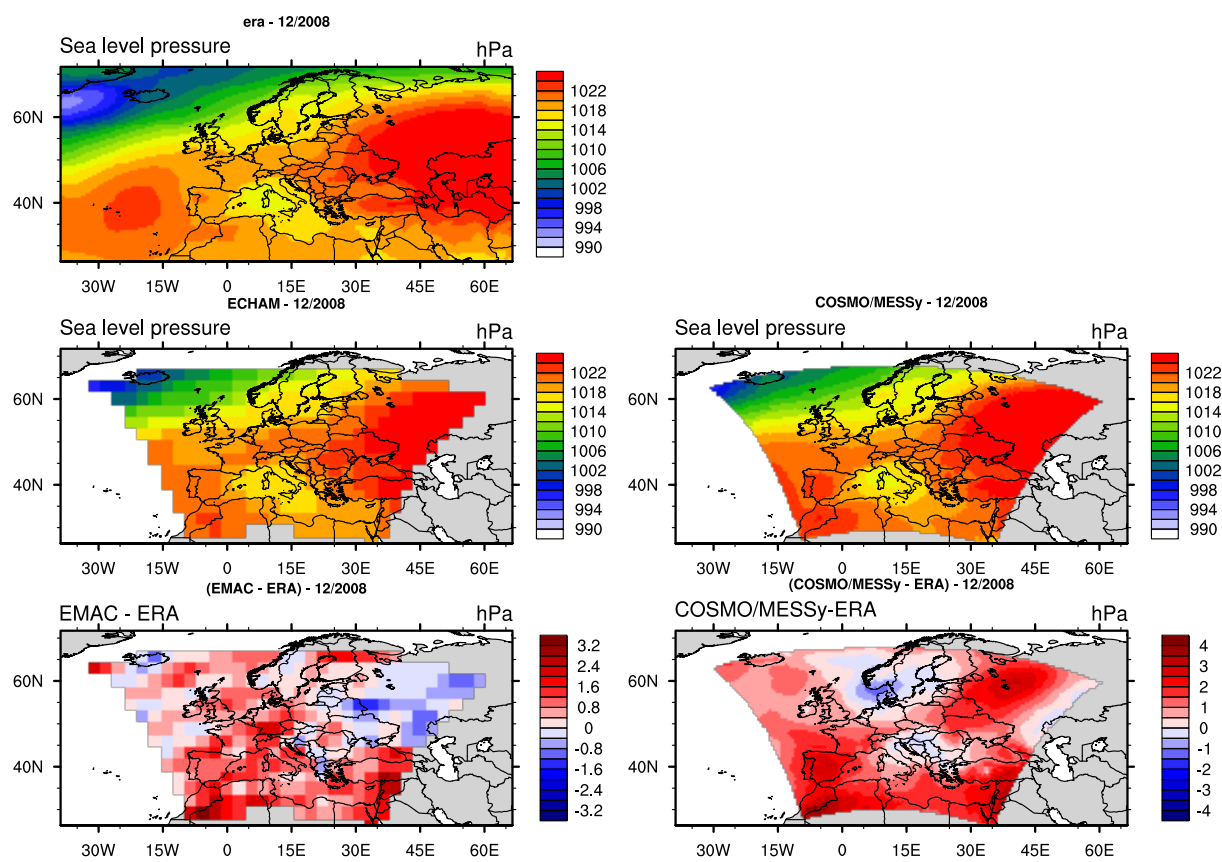

Figure S30: As Fig. S29 but for December 2008.



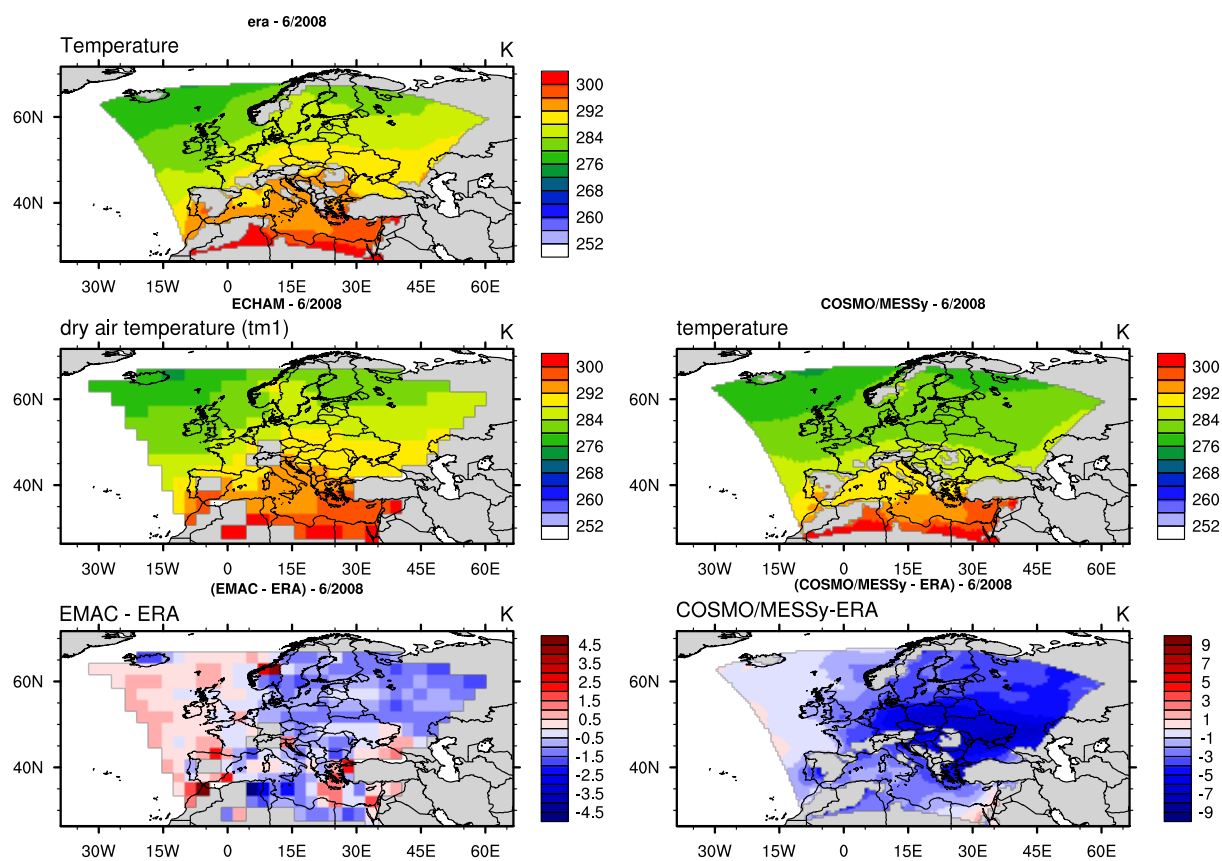

Figure S31: Comparison of the temperature at 950 hPa (in K) between EMAC, CM50 and ERA Interim for June 2008. The upper three plots show the absolute values for ERA-Interim, EMAC and CM50. The lower row depicts the difference to ERA-Interim for EMAC (left) and CM50 (right).

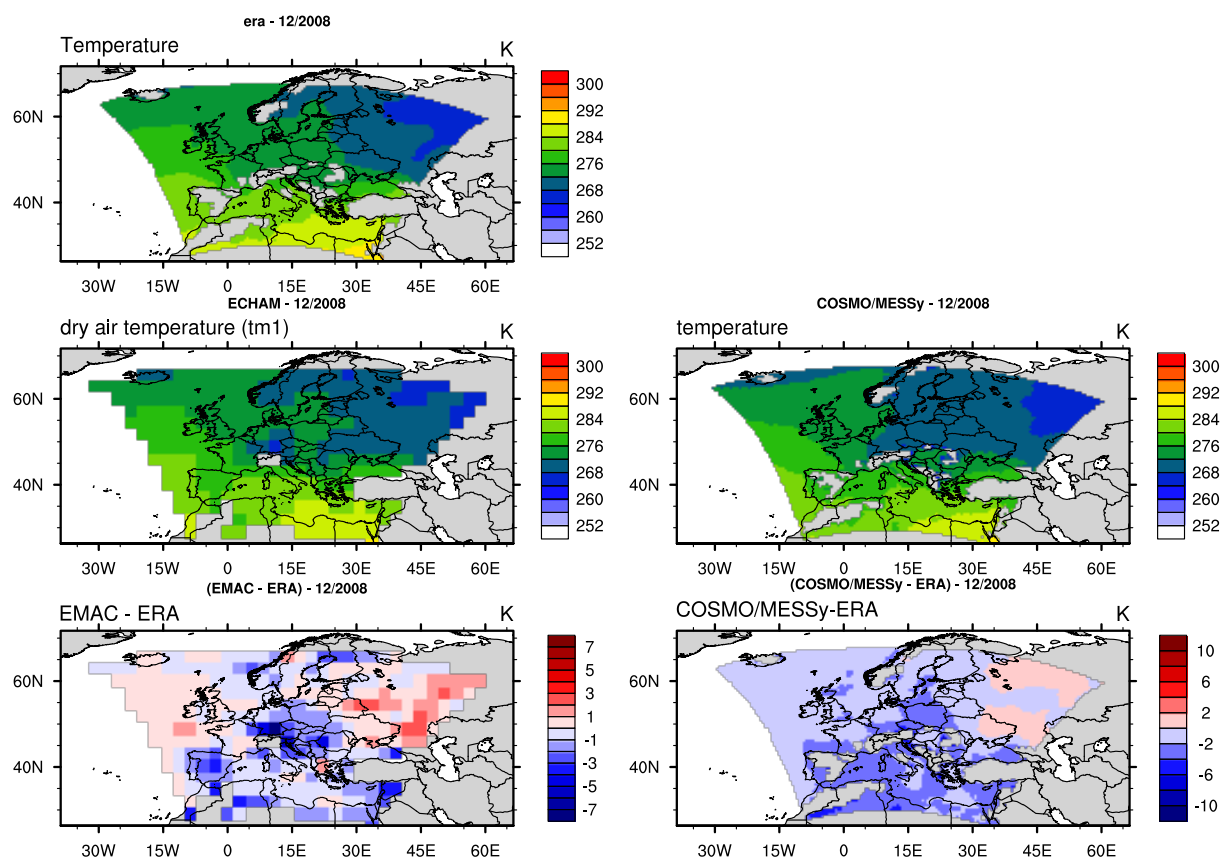

Figure S32: As Fig. S31 but for December 2008.

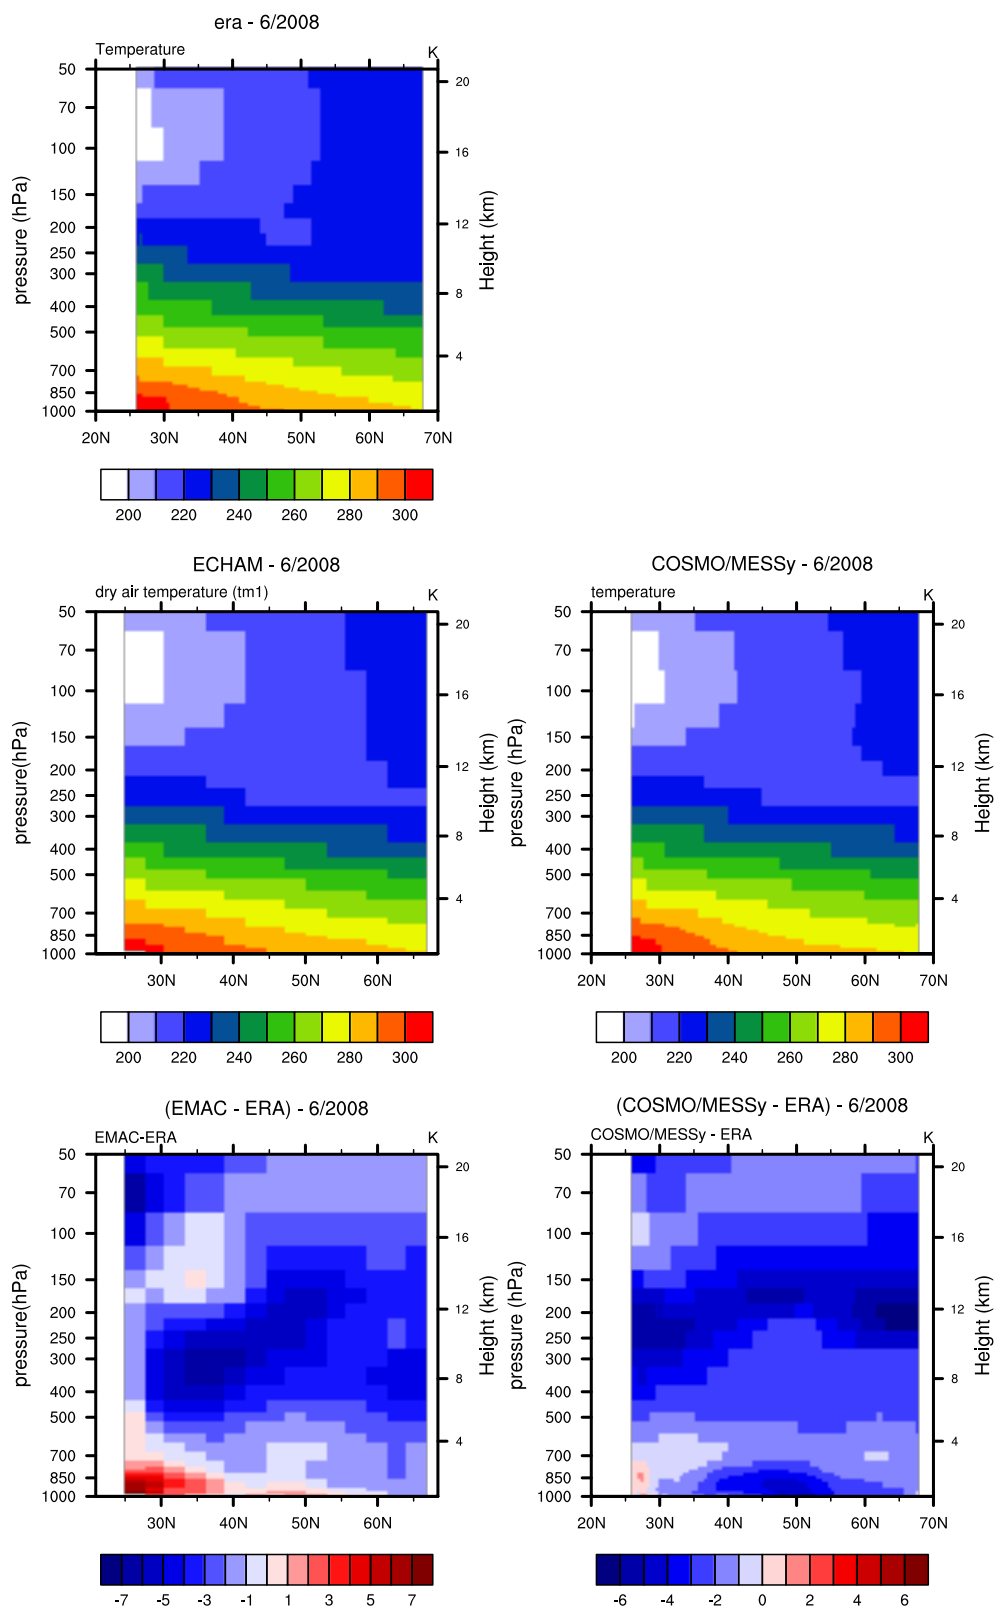

Figure S33: Comparison of the zonal average temperature (in K) between EMAC, CM50 and ERA Interim for June 2008. The upper three plots show the absolute values for ERA-Interim, EMAC and CM50. The lower row depicts the difference to ERA-Interim for EMAC (left) and CM50 (right).

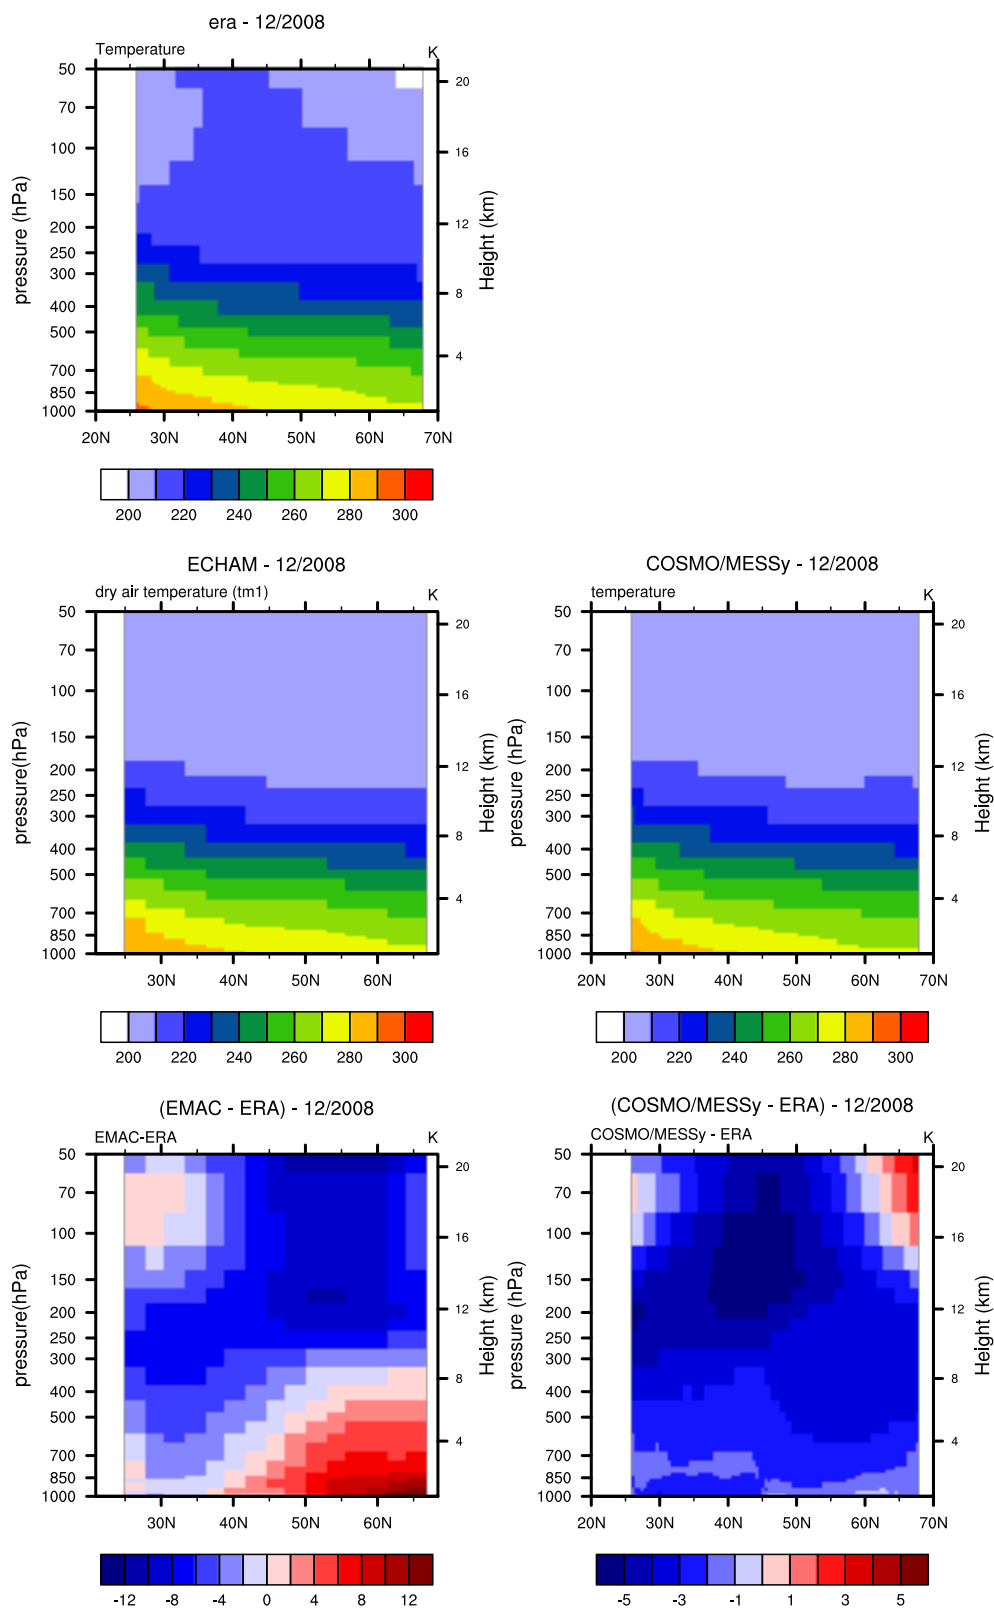

Figure S34: As Fig. S33 but for December 2008.

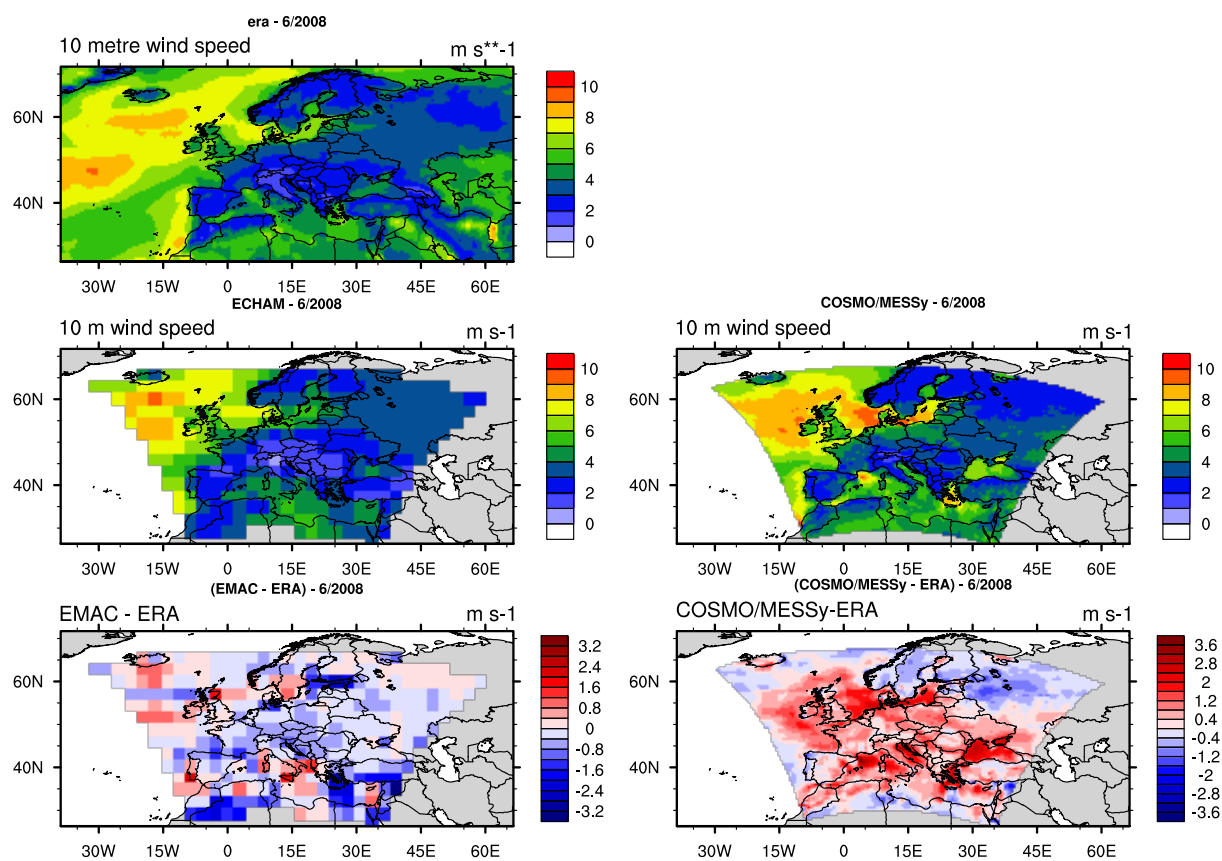

Figure S35: Comparison of the 10 meter wind speed (in  $\text{m s}^{-1}$ ) between EMAC, CM50 and ERA Interim for June 2008. The upper three plots show the absolute values for ERA-Interim, EMAC and CM50. The lower row depicts the difference to ERA-Interim for EMAC (left) and CM50 (right).

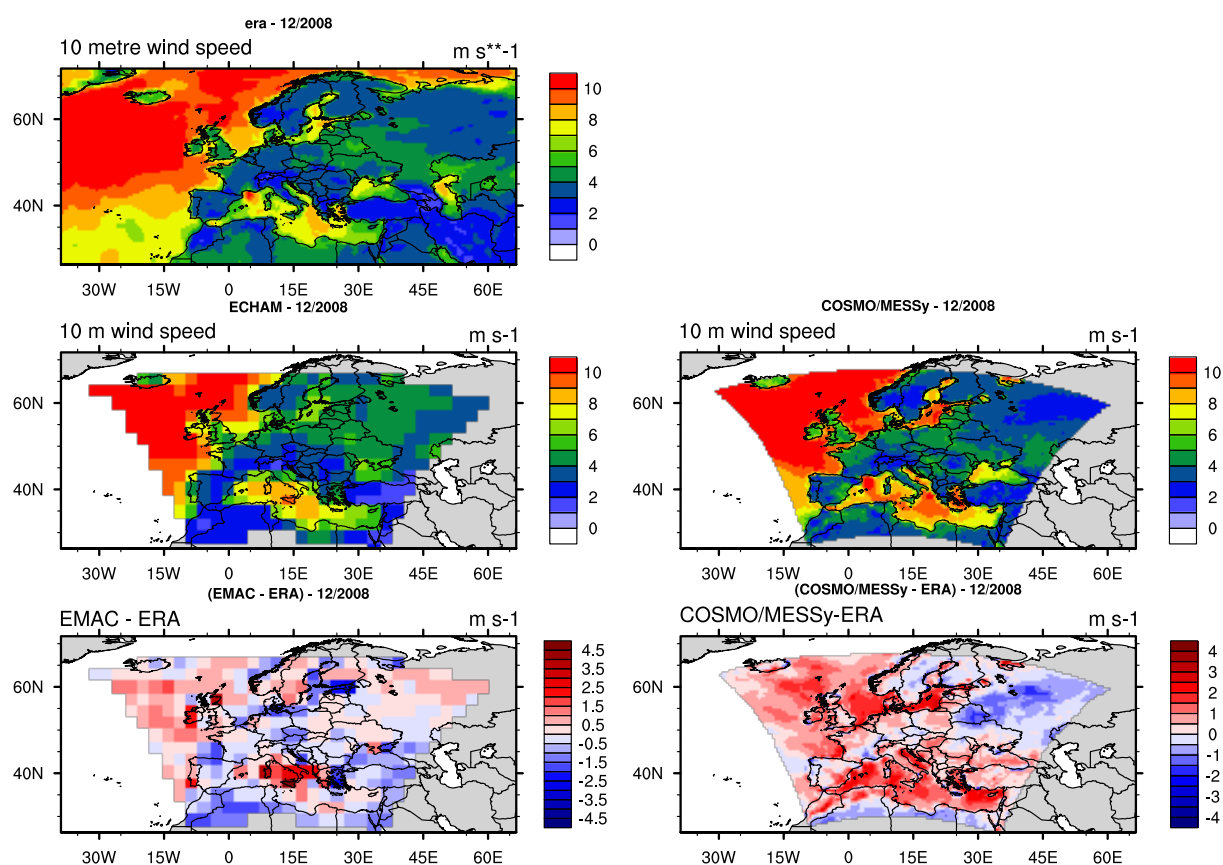

Figure S36: Comparison of the 10 meter wind speed (in  $\text{m s}^{-1}$ ) between EMAC, CM50 and ERA Interim for December 2008. The upper three plots show the absolute values for ERA-Interim, EMAC and CM50. The lower row depicts the difference to ERA-Interim for EMAC (left) and CM50 (right).

## S2.2 CM12

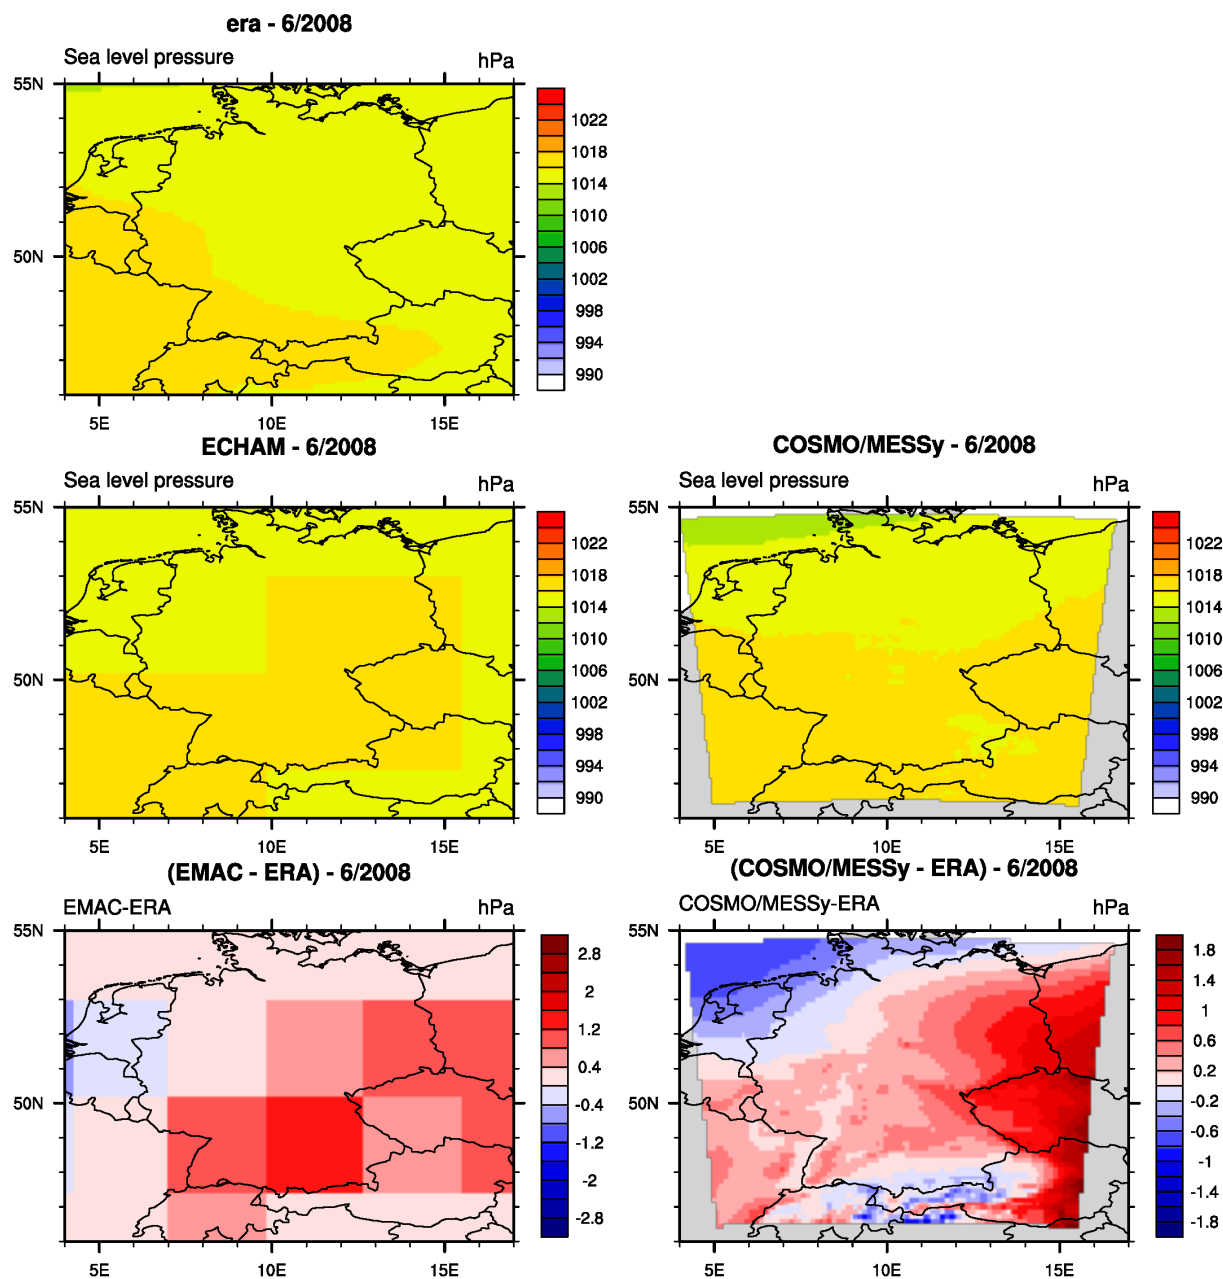

Figure S37: Comparison of the mean sea level pressure (in hPa) between EMAC, CM12 and ERA Interim for June 2008. The upper three plots show the absolute values for ERA-Interim, EMAC and CM12. The lower row depicts the difference to ERA-Interim for EMAC (left) and CM50 (right).

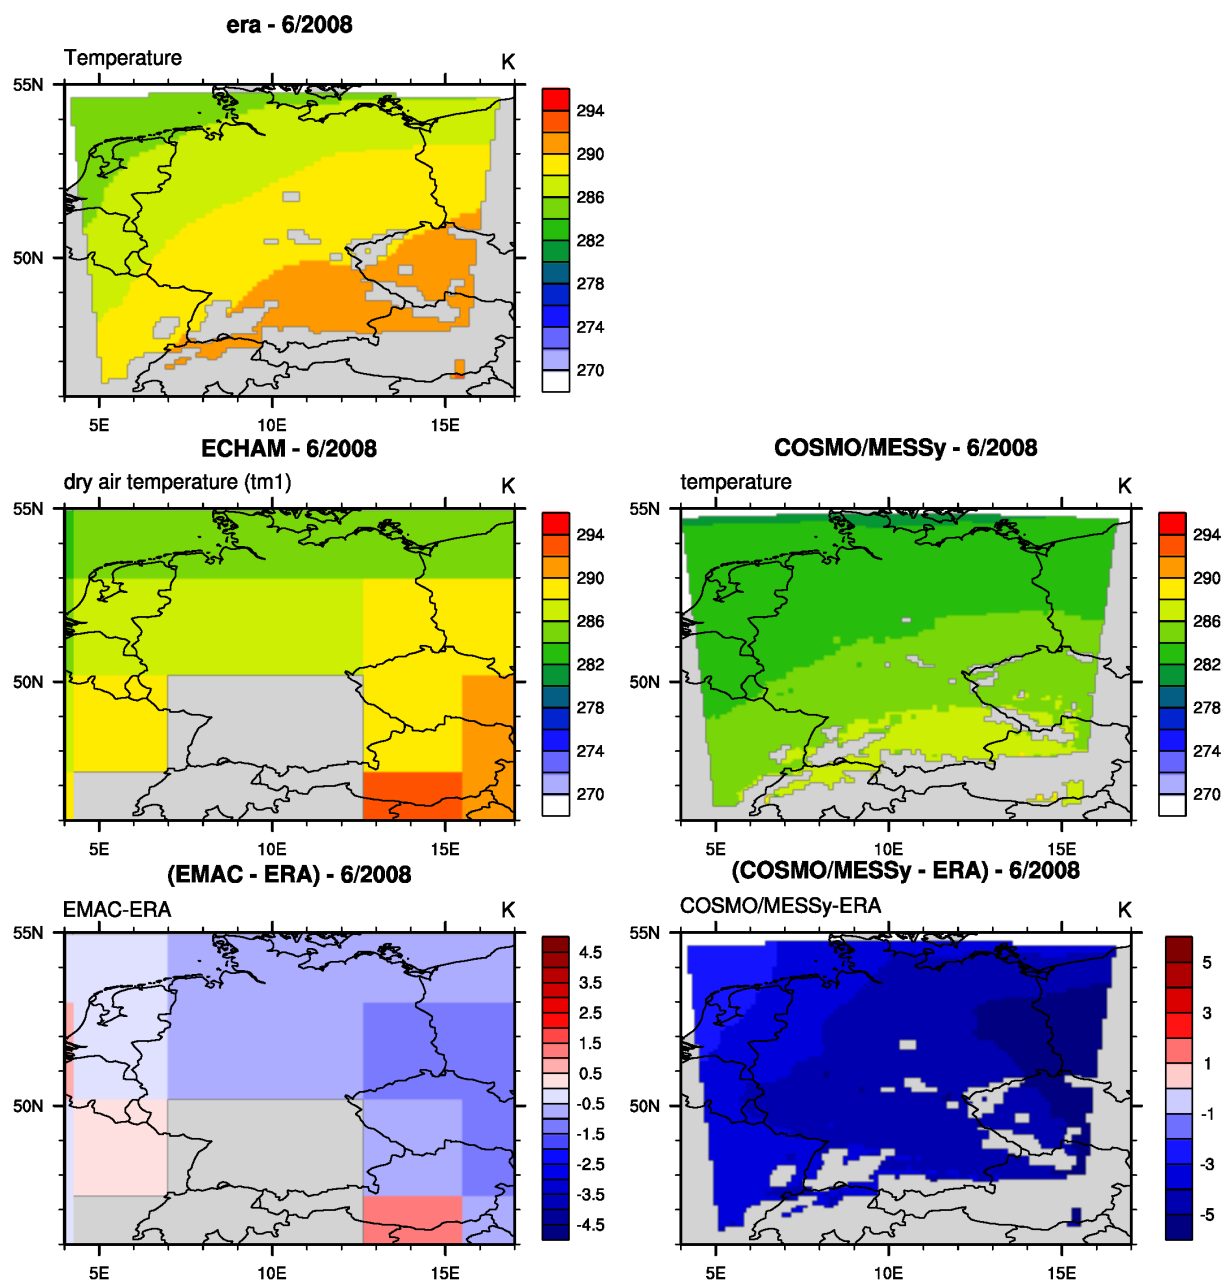

Figure S38: Comparison of the temperature at 950 hPa (in K) between EMAC, CM12 and ERA Interim for June 2008. The upper three plots show the absolute values for ERA-Interim, EMAC and CM12. The lower row depicts the difference to ERA-Interim for EMAC (left) and CM50 (right).



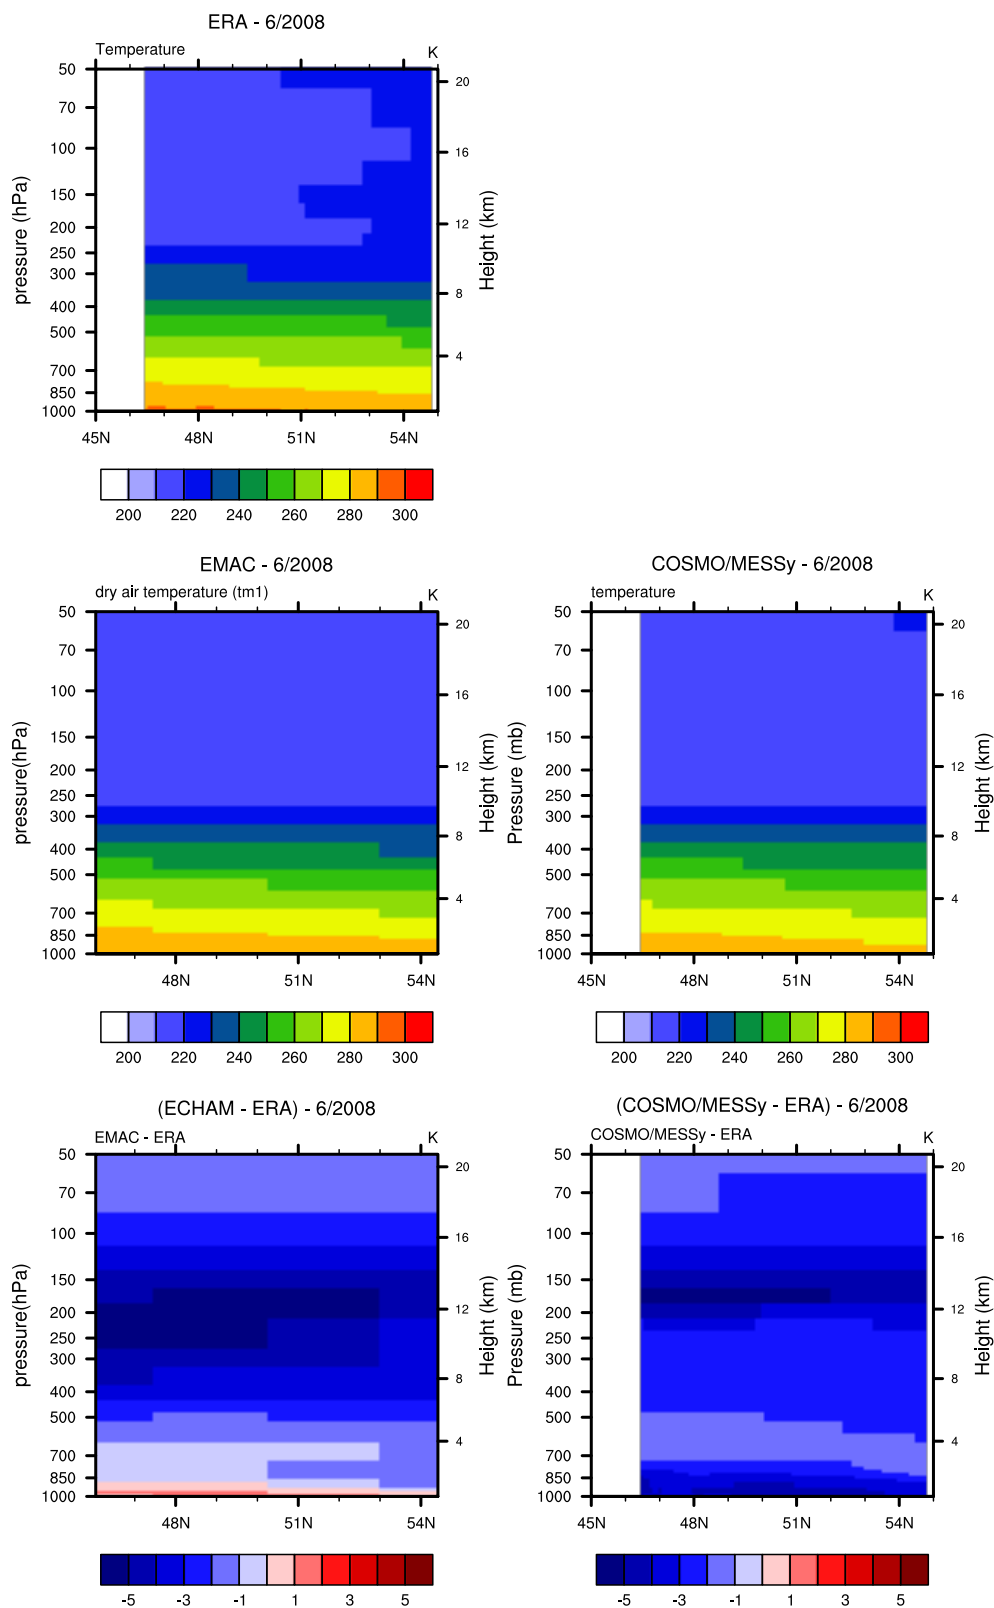

Figure S39: Comparison of zonal average temperature (in K) between EMAC, CM12 and ERA Interim for June 2008. The upper three plots show the absolute values for ERA-Interim, EMAC and CM12. The lower row depicts the difference to ERA-Interim for EMAC (left) and CM50 (right).

### S3 Comparison with temperature profiles from ozone sondes

#### S3.1 CM50

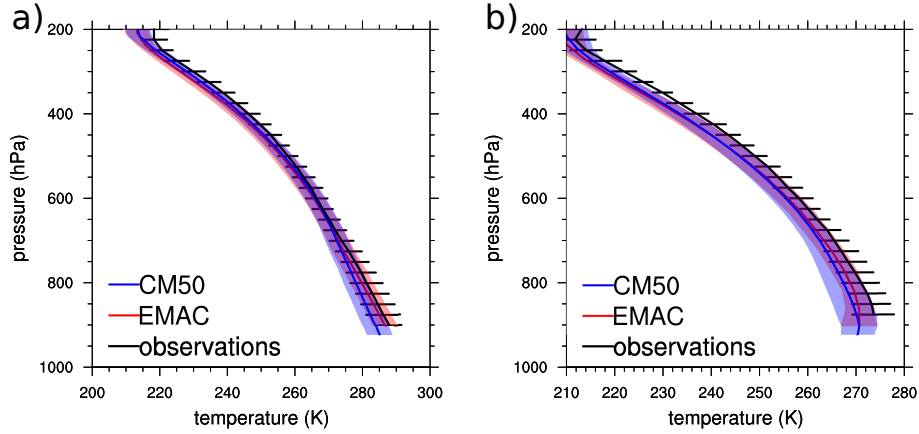

Figure S40: Vertical temperature profile at Hohenpeissenberg (in K) for **a)** June and **b)** December 2008. The standard deviation of the temporal mean is indicated by the error bars for the observations and by the shaded area for the model data.

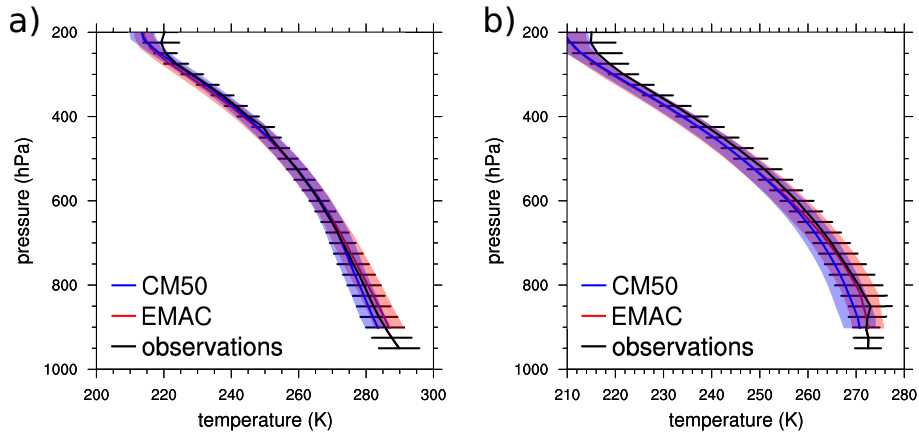

Figure S41: Vertical temperature profile at Payerne (in K) for (a) June and (b) December 2008. The standard deviation of the temporal mean is indicated by the error bars for the observations and by the shaded area for the model data.

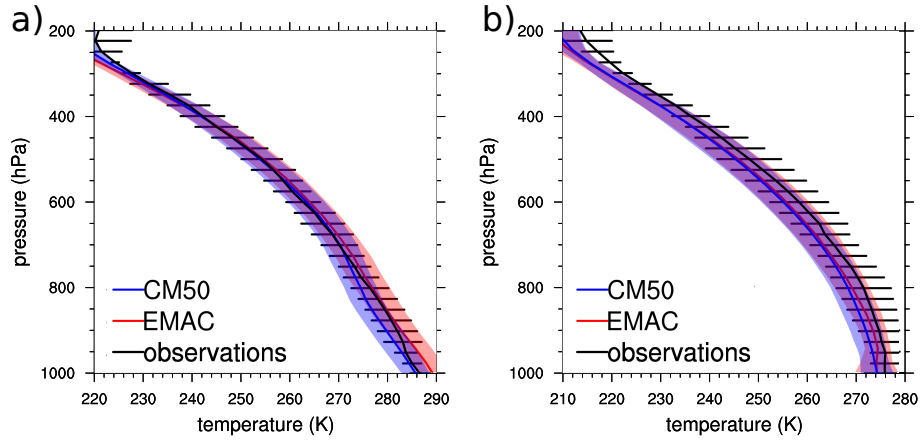

Figure S42: Vertical temperature profile at De Bilt (in K) for (a) June and (b) December 2008. The standard deviation of the temporal mean is indicated by the error bars for the observations and by the shaded area for the model data.

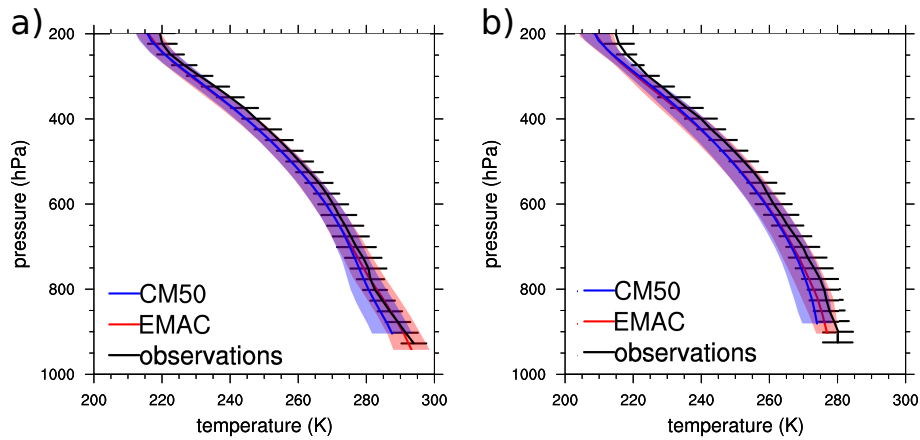

Figure S43: Vertical temperature profile at Madrid (in K) for (a) June and (b) December 2008. The standard deviation of the temporal mean is indicated by the error bars for the observations and by the shaded area for the model data.

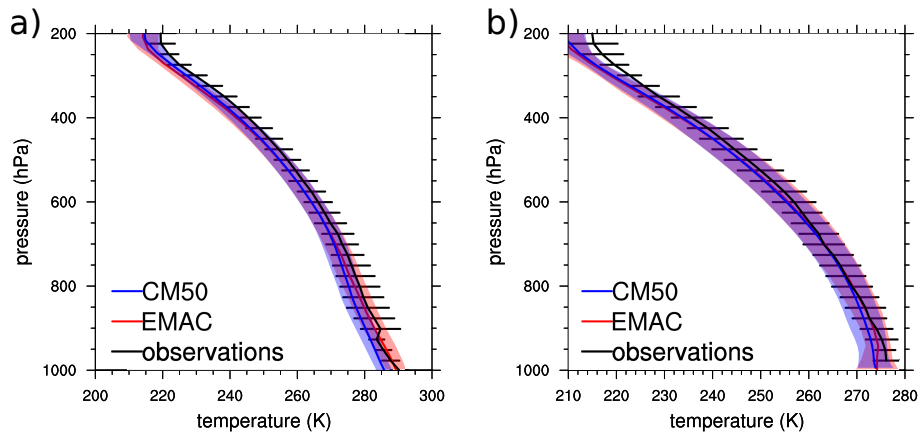

Figure S44: Vertical temperature profile at Uccle (in K) for (a) June and (b) December 2008. The standard deviation of the temporal mean is indicated by the error bars for the observations and by the shaded area for the model data.

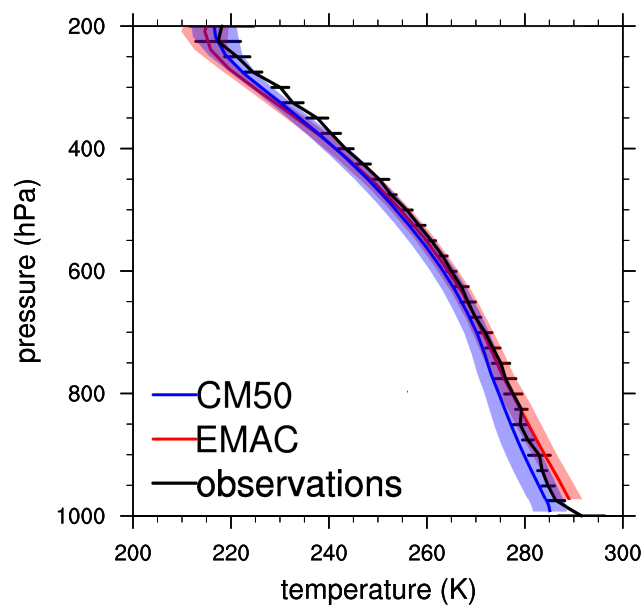

Figure S45: Vertical temperature profile at Legionowo for June 2008. The standard deviation of the temporal mean is indicated by the error bars for the observations and by the shaded area for the model data.

## S4 COSMO-Namelist

The section shows a comparison between the COSMO namelists used in this study and the COSMO-CLM namelists for the simulations within the EURO CORDEX framework (Kotlarski et al., 2014). Please note that this study uses a newer version of COSMO-CLM compared to the simulations described by Kotlarski et al. (2014), therefore some new namelist options are now available or defaults have been changed.

### S4.1 'lmgrid'-namelist

Table S1: Comparison between the COSMO-lmgrid namelist used in this study and the CORDEX-EU COSMO-CLM namelist (please note that the namelist for CORDEX-EU is from the COSMO-CLM version 4.8-clm17, while we use COSMO 5.0, therefore some options are not available in COSMO 4.8-clm17 (marked with \*)).

| Variable     | CM50 | CM12  | CORDEX-EU |
|--------------|------|-------|-----------|
| pollon       | -170 | -170  | -162      |
| pollat       | 40   | 41    | 39.25     |
| polgam       | 0    | 0     | 0         |
| dlon         | 0.44 | 0.1   | 0.44      |
| dlat         | 0.44 | 0.1   | 0.44      |
| startlon_tot | -3.9 | -25.6 | -33.93    |
| startlat_tot | -4.9 | -27.6 | -28.93    |
| ie_tot       | 132  | 104   | 132       |
| je_tot       | 122  | 114   | 129       |
| ke_tot       | 40   | 40    | 40        |

## S4.2 'runctl'-namelist

Table S2: Comparison between the COSMO-runcontrol namelist used in this study and the CORDEX-EU COSMO-CLM namelist (please note that the namelist for CORDEX-EU is from the COSMO-CLM version 4.8-clm17, while we use COSMO 5.0, therefore some options are not available (marked with \*)).

| Variable         | CM50 | CM12 | CORDEX-EU |
|------------------|------|------|-----------|
| dt               | 240  | 120  | 300       |
| itype_calendar   | 0    | 0    | 0         |
| hincmxt          | 6    | 6    | 24        |
| hincmxu          | 1    | 1    | 24        |
| leps             | F    | F    | F         |
| lphys            | T    | T    | T         |
| ldiagnos         | T    | T    | T         |
| ldfi             | F    | F    | F         |
| luseobs          | F    | F    | F         |
| luse_rtov        | F    | F    | F         |
| lcosmo_art       | F    | F    | *         |
| lpollen          | F    | F    | *         |
| ldump_ascii      | T    | T    | F         |
| lreproduce       | T    | T    | T         |
| lreorder         | F    | F    | F         |
| lartif_data      | F    | F    | F         |
| lperi_x          | F    | F    | *         |
| lperi_y          | F    | F    | *         |
| l2dim            | F    | F    | F         |
| lroutine         | F    | F    | *         |
| llm              | F    | F    | F         |
| nprocx           | 12   | 20   | 16        |
| nprocy           | 16   | 16   | 16        |
| nprocio          | 0    | 0    | 0         |
| num_asyncio_comm | 0    | 0    | *         |
| num_iope_percomm | 0    | 0    | *         |
| nboundlines      | 3    | 3    | 3         |
| ncomm_type       | 1    | 1    | 3         |
| ldatatypes       | F    | F    | F         |
| ltime_barrier    | T    | T    | F         |
| itype_timing     | 4    | 4    | 4         |
| idbg_level       | 10   | 10   | 2         |
| ldebug_dyn       | F    | F    | F         |
| ldebug_gsp       | F    | F    | F         |
| ldebug_rad       | F    | F    | F         |
| ldebug_tur       | F    | F    | F         |
| ldebug_con       | F    | F    | F         |
| ldebug_soi       | F    | F    | F         |
| ldebug_io        | F    | F    | F         |
| ldebug_mpe       | F    | F    | F         |
| ldebug_dia       | F    | F    | F         |
| ldebug_art       | F    | F    | F         |
| ldebug_ass       | F    | F    | F         |
| ldebug_lhn       | F    | F    | F         |

*Continued on next page*

Table S2 – *Continued from previous page*

| Variable      | CM50 | CM12 | CORDEX-EU |
|---------------|------|------|-----------|
| lprintdeb_all | F    | F    | F         |
| linit_fields  | F    | F    | F         |

### S4.3 'tuning'-namelist

Table S3: Comparison between the COSMO-tuning namelist used in this study and the CORDEX-EU COSMO-CLM namelist (please note that the namelist for CORDEX-EU is from the COSMO-CLM version 4.8 -clm17, while we use COSMO 5.0, therefore some options are not available (marked with \*)).

| Variable       | CM50      | CM12      | CORDEX-EU |
|----------------|-----------|-----------|-----------|
| crsmin         | 150       | 150       | 150       |
| rat_lam        | 1         | 1         | 1         |
| tkesmot        | 0.15      | 0.15      | 0.15      |
| wichfakt       | 0.15      | 0.15      | 0         |
| securi         | 0.5       | 0.5       | 0.85      |
| tkhmin         | 1         | 1         | 1         |
| tkmmin         | 1         | 1         | 1         |
| rlam_mom       | 0         | 0         | 0         |
| rlam_heat      | 1         | 1         | 1         |
| rat_sea        | 20        | 20        | 20        |
| rat_can        | 1         | 1         | 1         |
| c_lnd          | 2         | 2         | 2         |
| c_sea          | 1.5       | 1.5       | 1.5       |
| c_soil         | 1         | 1         | 1         |
| e_surf         | 1         | 1         | 1         |
| pat_len        | 500       | 500       | 500       |
| tur_len        | 500       | 500       | 500       |
| z0m_dia        | 0.2       | 0.2       | 0.2       |
| a_heat         | 0.74      | 0.74      | 0.74      |
| a_mom          | 0.92      | 0.92      | 0.92      |
| d_heat         | 10.1      | 10.1      | 10.1      |
| d_mom          | 16.6      | 16.6      | 16.6      |
| c_diff         | 0.2       | 0.2       | 0.2       |
| a_hshr         | 0.2       | 0.2       | *         |
| a_stab         | 0         | 0         | *         |
| clc_diag       | 0.5       | 0.5       | 0.5       |
| q_crit         | 4         | 4         | 4         |
| qc0            | 0         | 0         | 0         |
| qi0            | 0         | 0         | 0         |
| gkdrag         | 0.075     | 0.075     | 0.075     |
| gkwake         | 0.5       | 0.5       | 0.5       |
| mu_rain        | 0         | 0.5       | 0.5       |
| rain_n0_factor | 1         | 1         | *         |
| v0snow         | 25        | 25        | 25        |
| cloud_num      | 500000000 | 500000000 | 500000000 |
| entr_sc        | 0.0003    | 0.0003    | 0.0003    |
| thick_sc       | 25000     | 25000     | *         |



#### S4.4 'dyncontrol'-namelist

Table S4: Comparison between the COSMO-dyncontrol namelist used in this study and the CORDEX-EU COSMO-CLM namelist (please note that the namelist for CORDEX-EU is from the COSMO-CLM version 4.8-clm17, while we use COSMO 5.0, therefore some options are not available (marked with \*)).

| Variable           | CM50   | CM12   | CORDEX-EU |
|--------------------|--------|--------|-----------|
| epsass             | 0.15   | 0.15   | 0.15      |
| alphaass           | 1      | 1      | 0.53      |
| betasw             | 0.4    | 0.4    | 0.4       |
| betagw             | 0.4    | 0.4    | 0.4       |
| beta2sw            | 0.4    | 0.4    | 0.4       |
| beta2gw            | 0.4    | 0.4    | 0.4       |
| lrubc              | F      | F      | F         |
| lspubc             | T      | T      | T         |
| lexpl_lbc          | T      | T      | T         |
| lradlbc            | F      | F      | F         |
| lcond              | T      | T      | T         |
| ldiabf_lh          | T      | T      | T         |
| lw_freeslip        | T      | T      | T         |
| l2tls              | T      | T      | T         |
| y_vert_adv_dyn     | impl2  | impl2  | *         |
| lsemi_imp          | F      | F      | F         |
| lhordiff           | T      | T      | *         |
| ldyn_bbc           | F      | F      | T         |
| lcori              | T      | T      | T         |
| lmetr              | T      | T      | T         |
| lcori_deep         | F      | F      | F         |
| ladv_deep          | F      | F      | F         |
| y_scalar_advect    | BOTT2  | BOTT2  | BOTT2     |
| rdheight           | 11000  | 11000  | 11000     |
| crltau             | 1      | 1      | 1         |
| rlwidth            | 700000 | 150000 | 500000    |
| relax_fac          | 0.01   | 0.01   | 0.01      |
| nrddtau            | 6      | 6      | 6         |
| maxit_si           | 200    | 200    | 200       |
| ikrylow_si         | 20     | 20     | 20        |
| iprint_si          | 0      | 0      | 0         |
| irunge_kutta       | 1      | 1      | 1         |
| irk_order          | 3      | 3      | 3         |
| iadv_order         | 5      | 5      | 3         |
| ieva_order         | 3      | 3      | 3         |
| itheta_adv         | 0      | 0      | 0         |
| ltadv_limiter      | F      | F      | *         |
| itype_bbc_w        | 1      | 1      | *         |
| inter_max          | 1      | 1      | 1         |
| itype_outflow_qrsg | 1      | 1      | 1         |
| itype_lbc_qrsg     | 1      | 1      | 1         |
| itype_spubc        | 1      | 1      | 1         |
| nfi_spubc2         | 10     | 10     | 10        |
| itype_hdiff        | 2      | 2      | 2         |

*Continued on next page*

Table S4 – *Continued from previous page*

| Variable         | CM50 | CM12 | CORDEX-EU |
|------------------|------|------|-----------|
| l_diff_Smag      | T    | T    | *         |
| hd_corr_u_bd     | 0    | 0    | 0.25      |
| hd_corr_t_bd     | 0    | 0    | *         |
| hd_corr_trcr_bd  | 0    | 0    | *         |
| hd_corr_p_bd     | 0    | 0    | *         |
| hd_corr_u_in     | 0    | 0    | *         |
| hd_corr_t_in     | 0    | 0    | *         |
| hd_corr_trcr_in  | 0    | 0    | *         |
| hd_corr_p_in     | 0    | 0    | *         |
| hd_dhmax         | 250  | 250  | 250       |
| xkd              | 0.1  | 0.1  | 0.1       |
| divdamp_slope    | 20   | 20   | *         |
| eps_si           | 0    | 0    | 0         |
| itype_fast_waves | 1    | 1    | *         |
| lspecnudge       | F    | F    | F         |

## S4.5 'phycontrol'-namelist

Table S5: Comparison between the COSMO-phycontrol namelist used in this study and the CORDEX-EU COSMO-CLM namelist (please note that the namelist for CORDEX-EU is from the COSMO-CLM version 4.8 -clm17, while we use COSMO 5.0, therefore some options are not available (marked with \*)).

| Variable      | CM50 | CM12 | CORDEX-EU |
|---------------|------|------|-----------|
| lgsp          | T    | T    | T         |
| ldiniprec     | T    | T    | F         |
| lrad          | T    | T    | T         |
| itype_aerosol | 1    | 1    | *         |
| lemiss        | F    | F    | *         |
| lforest       | F    | F    | T         |
| ltur          | T    | T    | T         |
| l3dturb       | F    | F    | F         |
| l3dturb_metr  | T    | T    | T         |
| lprog_tke     | F    | F    | F         |
| limpltkediff  | T    | T    | *         |
| lconv         | T    | T    | T         |
| itype_conv    | 0    | 0    | 0         |
| lconv_inst    | F    | F    | F         |
| lsoil         | T    | T    | T         |
| lseaiice      | F    | F    | *         |
| llake         | F    | F    | F         |
| lso           | T    | T    | T         |
| lmelt         | T    | T    | T         |
| lmelt_var     | T    | T    | T         |
| lmulti_layer  | T    | T    | T         |
| ke_soil       | 7    | 7    | 9         |
| czbot_w_so    | 4    | 4    | 9         |
| lturhor       | F    | F    | F         |
| lexpcor       | F    | F    | F         |
| ltmpcor       | F    | F    | F         |
| lprfcor       | F    | F    | F         |
| lnonloc       | F    | F    | F         |
| lcpfluc       | F    | F    | F         |
| lconf_avg     | T    | T    | T         |
| lradf_avg     | F    | F    | F         |
| lcape         | F    | F    | F         |
| lctke         | F    | F    | F         |
| hincrad       | 1    | 1    | 1         |
| 3 nincrad     | 12   | 12   | 12        |
| nradcoarse    | 1    | 1    | 1         |
| ninctura      | 1    | 1    | 1         |
| nincconv      | 1    | 1    | 1         |
| nincsso       | 5    | 5    | 5         |
| itype_trvg    | 2    | 2    | 2         |
| itype_evsl    | 2    | 2    | 2         |
| itype_gscp    | 3    | 3    |           |
| itype_weld    | 2    | 2    | 2         |
| itype_tran    | 2    | 2    | 2         |

*Continued on next page*

Table S5 – *Continued from previous page*

| Variable     | CM50 | CM12 | CORDEX-EU |
|--------------|------|------|-----------|
| itype_turb   | 3    | 3    | 3         |
| itype_synd   | 2    | 2    | 2         |
| imode_tran   | 1    | 1    | 1         |
| imode_turb   | 1    | 1    | 1         |
| ico2_rad     | 8    | 8    | 8         |
| iy_co2_stab  | 2001 | 2001 | 2001      |
| lco2_stab    | F    | F    | F         |
| icldm_rad    | 4    | 4    | 4         |
| icldm_tran   | 0    | 0    | 0         |
| icldm_turb   | 2    | 2    | 2         |
| nlgw         | 2    | 2    | 2         |
| lrادتopo     | F    | F    | F         |
| nhorl        | 24   | 24   | 24        |
| itype_albedo | 2    | 2    | 2         |

## S5 List of used stations

Table S6: Overview of stations from the EMEP network used for the comparison. Columns four to six indicate the height of the geometric height of the station as well as the height were the data are sample in COSMO and EMAC ('height corrected'). The '-' indicates that no height correction is performed. The last column shows for which variables the station data were used.

| Name          | lat (in °) | lon (in °) | h. station (in m) | h. COSMO (in m) | h. EMAC (in m) | variable        |
|---------------|------------|------------|-------------------|-----------------|----------------|-----------------|
| Aliartos      | 38.37      | 23.08      | 110               | 325             | 198            | O3, NO2         |
| Anholt        | 56.71      | 11.51      | 40                | 36              | 151            | NO2             |
| Aston Hill    | 52.50      | -3.03      | 370               | 382             | 464            | NO2             |
| Auchencorth   | 55.79      | -3.24      | 260               | -               | -              | HNO3            |
| Moss          |            |            |                   |                 |                |                 |
| Ayia Marina   | 35.04      | 33.06      | 532               | 577             | 475            | O3              |
| Barcorotta    | 38.48      | -6.92      | 393               | 376             | 362            | O3, NO2         |
| Birkesens     | 58.38      | 8.25       | 190               | 304             | 139            | O3,NO2,<br>HNO3 |
| Cabau         | 51.97      | 4.93       | 1                 | 12              | 3              | NO2             |
| Ziideweg      |            |            |                   |                 |                |                 |
| Campisabalos  | 41.28      | -3.14      | 1360              | -               | -              | C5H8            |
| Chopok        | 48.93      | 19.58      | 2008              | 2109            | 2108           | NO2, HNO3       |
| Dezi          | 52.30      | 4.50       | 4                 | 10              | 84             | NO2             |
| Diabla Gora   | 54.15      | 22.07      | 157               | -               | -              | HNO3            |
| Els Torms     | 41.40      | 0.72       | 470               | 488             | 441            | NO2             |
| Eskdalemuir   | 51.57      | -3.20      | 243               | 253             | 298            | NO2             |
| Eupen         | 50.63      | 6.00       | 295               | 311             | 201            | O3, NO2         |
| Forsthof      | 48.11      | 15.92      | 581               | 567             | 655            | O3              |
| Giordon       | 36.07      | 14.22      | 167               | 181             | 226            | O3              |
| Lighthouse    |            |            |                   |                 |                |                 |
| Graz Platte   | 47.11      | 15.47      | 651               | 696             | 746            | O3              |
| Harwell       | 51.57      | -13.16     | 137               | 136             | 144            | NO2             |
| Hoburgen      | 56.91      | 18.15      | 58                | 70              | 64             | NO2             |
| Hurdal        | 60.37      | 11.08      | 300               | -               | -              | HNO3            |
| Illmitz       | 47.76      | 16.76      | 117               | 204             | 329            | CO,NO2,HNO3     |
| Iskraba       | 45.57      | 14.87      | 520               | 520             | 575            | O3,NO2          |
| Ispira        | 45.80      | 8.63       | 209               | 1262            | 892            | O3,NO2          |
| Jarczew       | 51.82      | 21.98      | 180               | 180             | 233            | O3,NO2          |
| Jungfrau-joch | 46.54      | 7.98       | 3578              | 3528            | 3581           | O3,CO, NO2      |
| Keldsnor      | 54.73      | 10.73      | 10                | 23              | 78             | NO2             |
| Kollumerwaard | 53.33      | 6.28       | 1                 | 11              | -51            | CO              |
| Kosetice      | 49.58      | 15.08      | 535               | 519             |                | NO2,CO,C5H8     |
| Krvavec       | 46.30      | 14.54      | 1740              | 1736            | 1916           | CO,HNO3         |
| La Coulande   | 48.63      | -0.45      | 304               | 333             | 323            | O3              |
| La Tardiere   | 46.65      | -0.75      | 133               | 133             | 192            | NO2             |
| Ladybower     | 53.40      | -1.75      | 420               | 358             | 503            | O3,NO2          |
| Research      |            |            |                   |                 |                |                 |
| Lahemaa       | 59.50      | 25.90      | 32                | 56              | 17             | O3              |
| Lazaropole    | 41.54      | 20.69      | 1332              | 1351            | 1398           | O3              |
| Le Casset     | 45.00      | 6.47       | 1790              | 1736            | 1623           | O3              |
| Leova II      | 46.48      | 28.28      | 166               | -               | -              | HNO3            |
| Lullington    | 50.79      | 0.18       | 120               | 117             | 62             | O3,NO2          |
| Heathrow      |            |            |                   |                 |                |                 |

*Continued on next page*

Table S6 – *Continued from previous page*

| Name          | lat (in °) | lon (in °) | h. station (in<br>m) | h. COSMO<br>(in m) | h. EMAC (in<br>m) | variable                            |
|---------------|------------|------------|----------------------|--------------------|-------------------|-------------------------------------|
| Mace Head     | 53.17      | -9.50      | 15                   | 56                 | 162               | O3                                  |
| Montellipreti | 42.10      | 12.63      | 48                   | 310                | 440               | O3,NO2,<br>HNO3                     |
| Narberth      | 51.78      | -4.69      | 160                  | 158                | 156               | NO2                                 |
| Neuglobsow    | 53.17      | 13.03      | 62                   | 65                 | 93                | O3,NO2,<br>HNO3, C5H8               |
| Niembro       | 43.44      | -4.85      | 134                  | 468                | 532               | O3, NO2                             |
| Noraa-Kvill   | 57.82      | 15.57      | 261                  | 256                | 180               | O3                                  |
| O Savinao     | 43.23      | -7.70      | 506                  | 556                | 406               | NO2                                 |
| St. Osyth     | 51.78      | 1.08       | 8                    | 32                 | 62                | CO,NO2                              |
| Pallas        | 68.0       | 24.15      | 340                  | -                  | -                 | C5H8                                |
| Penausende    | 41.28      | -5.87      | 985                  | 977                | 940               | NO2                                 |
| Peyrusse      | 43.62      | 0.19       | 200                  | 379                | 500               | C5H8, NO2                           |
| Vieille       |            |            |                      |                    |                   |                                     |
| Pic du Midi   | 42.94      | 0.14       | 2887                 | 2889               | 2736              | O3                                  |
| Preila        | 55.35      | 21.06      | 5                    | 26                 | 97                | O3,NO2                              |
| Puy de Dome   | 45.77      | 2.95       | 1468                 | 1486               | 1362              | O3,CO                               |
| Revin         | 49.90      | 4.63       | 390                  | 386                | 442               | O3, HNO3                            |
| Rigi          | 47.07      | 8.46       | 1031                 | -                  | -                 | HNO3, C5H8                          |
| Rojen Peak    | 41.70      | 24.74      | 1750                 | 1756               | 1724              | O3                                  |
| Rucava        | 56.16      | 21.17      | 18                   | 46                 | 114               | O3                                  |
| Schauinsland  | 47.92      | 7.92       | 1205                 | 1258               | 1273              | O3,CO, NO2,<br>HNO3, C5H8           |
| Schmücke      | 50.65      | 10.77      | 937                  | 873                | 888               | O3, NO2,<br>C5H8                    |
| Søgne         | 58.11      | 7.85       | 15                   | -                  | -                 | HNO3                                |
| Sniezka       | 50.73      | 15.73      | 1603                 | 1521               | 1507              | NO2                                 |
| Sonnblick     | 47.05      | 12.96      | 3106                 | 3099               | 3301              | CO                                  |
| Starina       | 49.05      | 22.27      | 345                  | 491                | 446               | O3,NO2,<br>HNO3, C5H8               |
| Sulzberg      | 47.53      | 9.93       | 1020                 | 1067               | 1001              | O3                                  |
| Svratouch     | 49.83      | 16.05      | 737                  | 727                | 685               | NO2                                 |
| La Tardiäre   | 46.65      | -0.75      | 133                  | -                  | -                 | C5H8                                |
| Tustervatn    | 65.83      | 13.91      | 439                  | -                  | -                 | HNO3                                |
| Ulborg        | 56.28      | 8.43       | 10                   | 31                 | 139               | O3                                  |
| Vilsandi      | 58.38      | 21.81      | 6                    | 12                 | 114               | O3                                  |
| Vizna         | 37.23      | -3.53      | 1296                 | 1209               | 1103              | O3, NO2                             |
| Vorhegg       | 46.62      | 12.97      | 1020                 | 1192               | 902               | CO,NO2                              |
| Vredepel      | 51.54      | 5.85       | 28                   | 32                 | 84                | NO2                                 |
| Waldhof       | 52.80      | 10.75      | 74                   | 77                 | 278               | O3, NO2,<br>HNO3, C5H8              |
| Westerland    | 54.93      | 8.31       | 12                   | 15                 | 12                | O3, NO2,<br>HNO3                    |
| Zarra         | 39.09      | -1.10      | 885                  | 840                | 984               | NO2                                 |
| Zingst        | 54.43      | 12.73      | 1                    | 11                 | 93                | O3, NO2,<br>HNO3, O3,<br>NO2, C5H8, |
| Zoesni        | 57.14      | 25.91      | 188                  | 200                | 173               | HNO3<br>O3, NO2,<br>C5H8            |

Table S7: Overview of stations providing vertical ozone profiles used for comparison. The last column shows for which variables the station data were used.

| Name            | lat (in °) | lon (in °) | height (in m) | variable |
|-----------------|------------|------------|---------------|----------|
| De Bilt         | 52.10      | 5.18 E     | 2             | O3       |
| Hohenpeißenberg | 47.80      | 11.01      | 985           | O3, C5H8 |
| Leginowo        | 52.40      | 29.97      | 96            | O3       |
| Madrid          | 40.45      | 3.72       | 680           | O3       |
| Payerne         | 46.81      | 6.94       | 490           | O3       |
| Uccle           | 50.80      | 4.36       | 100           | O3       |
| Valentia        | 51.94      | 10.25      | 14            | O3       |

## S6 Detailed list of used submodels

Table S8: Overview of the submodels running in EMAC and COSMO/MESSy respectively. Both COSMO/MESSy instances use the same submodels.

| Submodel | EMAC | COSMO | short description                                                        | references                                           |
|----------|------|-------|--------------------------------------------------------------------------|------------------------------------------------------|
| AEROPT   | x    |       | calculation of aerosol optical properties                                | Dietmüller et al. (2016)                             |
| AIRSEA   | x    | x     | exchange of tracers between air and sea                                  | Pozzer et al. (2006)                                 |
| CH4      | x    |       | methane oxidation and feedback to hydrological cycle                     |                                                      |
| CLOUD    | x    |       | cloud parametrisation                                                    | Roeckner et al. (2006), Jöckel et al. (2006)         |
| CLOUDOPT | x    |       | cloud optical properties                                                 |                                                      |
| CONVECT  | x    |       | convection parametrisation                                               | Tost et al. (2006b)                                  |
| CVTRANS  | x    | x     | convective tracer transport                                              | Tost et al. (2010)                                   |
| DRADON   | x    | x     | emission and decay of <sup>222</sup> Radon                               | Jöckel et al. (2010)                                 |
| DDEP     | x    | x     | dry deposition of aerosols and tracer                                    | Kerkweg et al. (2006a)                               |
| E2COSMO  | x    |       | additional ECHAM5 fields for COSMO coupling                              | Kerkweg and Jöckel (2012)                            |
| GWAVE    | x    |       | parametrisation of non-orographic gravity waves                          | Roeckner et al. (2003)                               |
| H2O      | x    |       | stratospheric water vapour and its feedback                              | Jöckel et al. (2006)                                 |
| JVAL     | x    | x     | calculation of photolysis rates                                          | Landgraf and Crutzen (1998), Jöckel et al. (2006)    |
| LNOX     | x    |       | NO <sub>x</sub> -production by lighting                                  | Tost et al. (2007), Jöckel et al. (2010)             |
| MECCA    | x    | x     | tropospheric and stratospheric gas-phase chemistry                       | Sander et al. (2011), Jöckel et al. (2010)           |
| MMD*     | x    | x     | coupling of EMAC and COSMO/MESSy (including libraries and all submodels) | Kerkweg and Jöckel (2012)                            |
| MSBM     | x    | x     | multiphase chemistry of the stratosphere                                 | Jöckel et al. (2010)                                 |
| O3ORIG   | x    |       | ozone origin diagnostics                                                 | Grewe (2006)                                         |
| OFFEMIS  | x    | x     | prescribed emissions of trace gases and aerosols                         | Kerkweg et al. (2006b)                               |
| ONEMIS   | x    | x     | on-line calculated emissions of trace gases and aerosols                 | Kerkweg et al. (2006b)                               |
| ORBIT    | x    | x     | Earth orbit calculations                                                 | Dietmüller et al. (2016)                             |
| PTRAC    | x    | x     | definition of prognostic tracers                                         | Jöckel et al. (2008)                                 |
| QBO      | x    |       | Newtonian relaxation of the quasi-biennial oscillation (QBO)             | Giorgetta and Bengtsson (1999), Jöckel et al. (2006) |
| RAD      | x    |       | radiative transfer calculations calculation                              | Dietmüller et al. (2016)                             |
| S4D      | x    | x     | diagnostic sampling along predefined tracks                              | Jöckel et al. (2010)                                 |
| SATSIMS  | x    |       | satellite simulator                                                      |                                                      |
| SCALC    | x    | x     | simple calculations                                                      | Jöckel et al. (2010)                                 |
| SCAV     | x    | x     | wet deposition and scavenging of trace gases and aerosols                | Tost et al. (2006a)                                  |
| SCOUT    | x    | x     | diagnostic sampling at predefined locations                              | Jöckel et al. (2010)                                 |
| SEDI     | x    | x     | sedimentation of aerosols                                                | Kerkweg et al. (2006a)                               |
| SORBIT   | x    | x     | sampling along sun synchronous satellite orbits                          | Jöckel et al. (2010)                                 |

*Continued on next page*



Table S8 – *Continued from previous page*

| Submodel | EMAC | COSMO | short description                                                         | references             |
|----------|------|-------|---------------------------------------------------------------------------|------------------------|
| SURFACE  | x    |       | surface properties                                                        | Jöckel et al. (2016)   |
| TAGGING  | x    | x     | TAGGING of source attributions                                            | Grewe et al. (2016)    |
| TBUDGET  | x    |       | contribution of processes to a tracer                                     | Jöckel et al. (2016)   |
| TNUDGE   | x    | x     | Newtonian relaxation of tracers                                           | Kerkweg et al. (2006b) |
| TREXP    | x    |       | emission of tracers at point sources                                      | Jöckel et al. (2010)   |
| TROPOP   | x    | x     | diagnostic calculation of tropopause height<br>and additional diagnostics | Jöckel et al. (2006)   |
| VISO     | x    | x     | sampling on isosurfaces                                                   | Jöckel et al. (2010)   |

## S7 References

### References

- Dietmüller, S., Jöckel, P., Tost, H., Kunze, M., Gellhorn, C., Brinkop, S., Frömming, C., Ponater, M., Steil, B., Lauer, A., and Hendricks, J.: A new radiation infrastructure for the Modular Earth Submodel System (MESSy, based on version 2.51), *Geoscientific Model Development*, 9, 2209–2222, doi:10.5194/gmd-9-2209-2016, URL <http://www.geosci-model-dev.net/9/2209/2016/>, 2016.
- Giorgetta, M. A. and Bengtsson, L.: Potential role of the quasi-biennial oscillation in the stratosphere-troposphere exchange as found in water vapor in general circulation model experiments, *J. Geophys. Res. Atmos.*, 104, 6003–6019, doi:10.1029/1998JD200112, URL <http://dx.doi.org/10.1029/1998JD200112>, 1999.
- Grewe, V.: The origin of ozone, *Atmos. Chem. Phys.*, 6, 1495–1511, doi:10.5194/acp-6-1495-2006, URL <http://www.atmos-chem-phys.net/6/1495/2006/>, 2006.
- Grewe et al.: Manuscript in preparation for GMD(D), 2016.
- Jöckel, P., Tost, H., Pozzer, A., Brühl, C., Buchholz, J., Ganzeveld, L., Hoor, P., Kerkweg, A., Lawrence, M., Sander, R., Steil, B., Stiller, G., Tanarhte, M., Taraborrelli, D., van Aardenne, J., and Lelieveld, J.: The atmospheric chemistry general circulation model ECHAM5/MESSy1: consistent simulation of ozone from the surface to the mesosphere, *Atmos. Chem. Phys.*, 6, 5067–5104, doi:10.5194/acp-6-5067-2006, URL <http://www.atmos-chem-phys.net/6/5067/2006/>, 2006.
- Jöckel, P., Kerkweg, A., Buchholz-Dietsch, J., Tost, H., Sander, R., and Pozzer, A.: Technical Note: Coupling of chemical processes with the Modular Earth Submodel System (MESSy) submodel TRACER, *Atmos. Chem. Phys.*, 8, 1677–1687, doi:10.5194/acp-8-1677-2008, URL <http://www.atmos-chem-phys.net/8/1677/2008/>, 2008.
- Jöckel, P., Kerkweg, A., Pozzer, A., Sander, R., Tost, H., Riede, H., Baumgaertner, A., Gromov, S., and Kern, B.: Development cycle 2 of the Modular Earth Submodel System (MESSy2), *Geosci. Model Dev.*, 3, 717–752, doi:10.5194/gmd-3-717-2010, URL <http://www.geosci-model-dev.net/3/717/2010/>, 2010.
- Jöckel, P., Tost, H., Pozzer, A., Kunze, M., Kirner, O., Brenninkmeijer, C. A. M., Brinkop, S., Cai, D. S., Dyroff, C., Eckstein, J., Frank, F., Garny, H., Gottschaldt, K.-D., Graf, P., Grewe, V., Kerkweg, A., Kern, B., Matthes, S., Mertens, M., Meul, S., Neumaier, M., Nützel, M., Oberländer-Hayn, S., Ruhnke, R., Runde, T., Sander, R., Scharffe, D., and Zahn, A.: Earth System Chemistry integrated Modelling (ESCiMo) with the Modular Earth Submodel System (MESSy) version 2.51, *Geosci. Model Dev.*, 9, 1153–1200, doi:10.5194/gmd-9-1153-2016, URL <http://www.geosci-model-dev.net/9/1153/2016/>, 2016.
- Kerkweg, A. and Jöckel, P.: The 1-way on-line coupled atmospheric chemistry model system MECO(n) - Part 2: On-line coupling with the Multi-Model-Driver (MMD), *Geosci. Model Dev.*, 5, 111–128, doi:10.5194/gmd-5-111-2012, URL <http://www.geosci-model-dev.net/5/111/2012/>, 2012.
- Kerkweg, A., Buchholz, J., Ganzeveld, L., Pozzer, A., Tost, H., and Jöckel, P.: Technical Note: An implementation of the dry removal processes DRY DEPosition and SEDimentation in the Modular Earth Submodel System (MESSy), *Atmos. Chem. Phys.*, 6, 4617–4632, doi:10.5194/acp-6-4617-2006, URL <http://www.atmos-chem-phys.net/6/4617/2006/>, 2006a.
- Kerkweg, A., Sander, R., Tost, H., and Jöckel, P.: Technical note: Implementation of prescribed (OFFLEM), calculated (ONLEM), and pseudo-emissions (TNUDGE) of chemical species in the Modular Earth Submodel System (MESSy), *Atmos. Chem. Phys.*, 6, 3603–3609, doi:10.5194/acp-6-3603-2006, URL <http://www.atmos-chem-phys.net/6/3603/2006/>, 2006b.
- Kotlarski, S., Keuler, K., Christensen, O. B., Colette, A., Déqué, M., Gobiet, A., Goergen, K., Jacob, D., Lüthi, D., van Meijgaard, E., Nikulin, G., Schär, C., Teichmann, C., Vautard, R., Warrach-Sagi, K., and Wulfmeyer, V.: Regional climate modeling on European scales: a joint standard evaluation of the EURO-CORDEX RCM ensemble, *Geosci. Model Dev.*, 7, 1297–1333, doi:10.5194/gmd-7-1297-2014, URL <http://www.geosci-model-dev.net/7/1297/2014/>, 2014.

- Landgraf, J. and Crutzen, P. J.: An efficient method for online calculations of photolysis and heating rates., *J. Atmos. Sci.*, 55, 863–878, doi:<http://dx.doi.org/10.1175/1520-0469>, 1998.
- Pozzer, A., Jöckel, P., Sander, R., Williams, J., Ganzeveld, L., and Lelieveld, J.: Technical Note: The MESSy-submodel AIRSEA calculating the air-sea exchange of chemical species, *Atmos. Chem. Phys.*, 6, 5435–5444, doi:10.5194/acp-6-5435-2006, URL <http://www.atmos-chem-phys.net/6/5435/2006/>, 2006.
- Roeckner, E., Bäuml, G., Bonaventura, L., Brokopf, R., Esch, M., Giorgetta, M., Hagemann, S., Kirchner, I., Kornbluh, L., Manzini, E., Rhodin, A., Schlese, U., Schulzweida, U., and Tompkins, A.: The atmospheric general circulation model ECHAM5. PART I: Model description, MPI-Report 349, Max Planck Institut für Meteorologie in Hamburg, Deutschland, available at: [https://www.mpimet.mpg.de/fileadmin/publikationen/Reports/max\\_scirep\\_349.pdf](https://www.mpimet.mpg.de/fileadmin/publikationen/Reports/max_scirep_349.pdf) (last access: 18 October 2015), 2003.
- Roeckner, E., Brokopf, R., Esch, M., Giorgetta, M., Hagemann, S., Kornbluh, L., Manzini, E., Schlese, U., and Schulzweida, U.: Sensitivity of Simulated Climate to Horizontal and Vertical Resolution in the ECHAM5 Atmosphere Model, *J. Climate*, 19, 3771–3791, doi:10.1175/jcli3824.1, URL <http://dx.doi.org/10.1175/jcli3824.1>, 2006.
- Sander, R., Baumgaertner, A., Gromov, S., Harder, H., Jöckel, P., Kerkweg, A., Kubistin, D., Regelin, E., Riede, H., Sandu, A., Taraborrelli, D., Tost, H., and Xie, Z.-Q.: The atmospheric chemistry box model CAABA/MECCA-3.0, *Geosci. Model Dev.*, 4, 373–380, doi:10.5194/gmd-4-373-2011, URL <http://www.geosci-model-dev.net/4/373/2011/>, 2011.
- Tost, H., Jöckel, P., Kerkweg, A., Sander, R., and Lelieveld, J.: Technical note: A new comprehensive SCAVenging submodel for global atmospheric chemistry modelling, *Atmos. Chem. Phys.*, 6, 565–574, doi:10.5194/acp-6-565-2006, URL <http://www.atmos-chem-phys.net/6/565/2006/>, 2006a.
- Tost, H., Jöckel, P., and Lelieveld, J.: Influence of different convection parameterisations in a GCM, *Atmos. Chem. Phys.*, 6, 5475–5493, doi:10.5194/acp-6-5475-2006, URL <http://www.atmos-chem-phys.net/6/5475/2006/>, 2006b.
- Tost, H., Jöckel, P., and Lelieveld, J.: Lightning and convection parameterisations &ndash; uncertainties in global modelling, *Atmos. Chem. Phys.*, 7, 4553–4568, doi:10.5194/acp-7-4553-2007, URL <http://www.atmos-chem-phys.net/7/4553/2007/>, 2007.
- Tost, H., Lawrence, M. G., Brühl, C., Jöckel, P., Team, T. G., and Team, T. S.-O.-D.: Uncertainties in atmospheric chemistry modelling due to convection parameterisations and subsequent scavenging, *Atmos. Chem. Phys.*, 10, 1931–1951, doi:10.5194/acp-10-1931-2010, URL <http://www.atmos-chem-phys.net/10/1931/2010/>, 2010.
