# Supplementary material for: The 1-way on-line coupled model system MECO(n) – Part 4: Chemical evaluation (based on MESSy v2.52)
Source: Copernicus journal article supplement (doi:10.5194/gmd-9-3545-2016), 2016-10-04
Supplement: Supplementary file [file gmd-9-3545-2016-supplement-title-page.pdf › gmd-9-3545-2016-supplement-title-page.pdf]

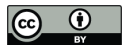

## *Supplement of*

# **The 1-way on-line coupled model system MECO(n) – Part 4: Chemical evaluation (based on MESSy v2.52)**

**Mariano Mertens et al.**

*Correspondence to:* Mariano Mertens ([mariano.mertens@dlr.de](mailto:mariano.mertens@dlr.de))

- [gmd-9-3545-2016-supplement-title-page.pdf](#)
- [zip](#)
  - [meccanism\\_mecca.pdf](#)
  - [meccanism\\_scav.pdf](#)
  - [nml-setup](#)
    - \* [01](#)
    - \* [02](#)
    - \* [03](#)
  - [supplement.pdf](#)

The copyright of individual parts of the supplement might differ from the CC-BY 3.0 licence.
